# Supplementary material for: Hierarchical architecture of dopaminergic circuits enables second-order conditioning in Drosophila
Source: bioRxiv preprint, doi:10.1101/2022.03.30.486484, version 2 (2022-04-02)
Supplement: Supplementary_File_1 [file 486484_file02.xlsx]

## Sheet: Sheet2
											Interaction	From	From	From	From	From	From	From	From	From	From	From	From	From	From	From	From	From	From	From	From	From	From	From	From	From	From	From	From	From	From	From	From	From	From	From	From		TO
											Transmitter	Glu	Glu	Glu	Glu	Glu	Glu	Glu	GABA	GABA	GABA	Ach	Ach	Ach	Ach	Ach	Ach	Ach	Ach	Ach	Ach	(GABA)	(Ach)	(Ach)	(Ach)	(Ach)	(Glu)	(Ach)	(Ach)	(Ach)	(Ach)	(Glu)	(GABA)	(GABA)	(Ach)	(Glu)	(Ach)		5HT
	N_synapseses predicted as										MB compartments	y5B'2a	B2B'2a	B'2mp	B'2mp_bilateral	y4>y1y2	B1>a	a1	y3B'1	B'1	y1pedc>a:B	y2a'1	a'2	a3	a'1	a'1a'2	a'3ap	a'3m	a'2a'3	a2sc	a2p3p	y1y2	y4y5	calyx	a2sp	B2y5	y1y2	B'2d	y5d	a'3a	y4y5	y1y2y3	a'1a	y2	y2y3	y2	y2
type	GABA	acetylcholine	glutamate	serotonin	octopamine	dopamine	Total_N_synapses	Fraction of highest NT	NTprediction	EM id	type	MBON01	MBON02	MBON03	MBON04	MBON05	MBON06	MBON07	MBON09	MBON10	MBON11	MBON12	MBON13	MBON14	MBON15	MBON15-like	MBON16	MBON17	MBON17-like	MBON18	MBON19	MBON20	MBON21	MBON22	MBON23	MBON24	MBON25	MBON26	MBON27	MBON28 (MBON16-like)	MBON29	MBON30	MBON31	MBON32	MBON33	MBON34	MBON35		CSD
SMP108	37.66	2416.63	165.36	5.53	21.83	106	2753	0.877814	acetylcholine	298258513, 361445621	SMP108	153	12	0	75	42	0	0	0	0	0	0	0	0	0	0	0	0	0	0	0	0	0	0	0	0	0	0	0	0	0	0	0	0	0	0	0		0
SMP177	199.07	3472.88	404.68	18.41	37.66	165.29	4298	0.808024	acetylcholine	422751191, 485585976	SMP177	13	0	258	22	0	0	0	10	0	0	240	85	0	0	0	39	42	25	0	0	0	0	0	0	0	0	0	0	0	0	0	0	0	0	0	0		0
CRE011	117.178	2385.61	224.965	28.5572	34.169	60.5158	2851	0.836764	acetylcholine	5901213440, 674882250	CRE011	402	0	47	486	329	0	0	0	0	0	486	0	0	0	0	0	0	10	0	0	0	0	0	0	0	0	0	0	0	0	0	87	21	0	0	402		0
SMP109	85.05	1569.28	218.43	6.82	23.81	69.62	1973	0.795374	acetylcholine	360773196, 5813009620	SMP109	0	0	0	0	0	0	0	0	0	0	0	0	0	0	0	0	0	0	0	0	0	0	0	0	0	0	0	0	0	0	0	50	0	0	0	0		0
CRE059	125.927	1235.22	228.49	25.134	90.0424	484.183	2189	0.564286	acetylcholine	1015570297, 5813022759, 706862579, 984540390	CRE059	0	0	0	0	0	0	0	0	0	0	0	0	0	0	0	0	0	0	0	0	0	21	0	0	0	0	0	0	0	0	0	0	0	0	0	0		0
Leaves Body	38.09	447.28	38.88	12.23	105.53	296	938	0.476839	acetylcholine	518217691, 579425252	Leaves Body	100	0	0	0	0	0	0	0	0	0	0	0	0	0	0	0	0	0	0	0	0	0	0	0	0	0	0	0	0	0	0	0	0	0	0	0		0
LHPV10d1	180.34	2493.89	241.86	17.75	49.78	291.39	3275	0.761491	acetylcholine	423748579, 725701350	LHPV10d1	155	53	0	77	0	0	0	0	0	0	73	88	0	10	0	0	0	0	64	0	0	0	0	0	10	0	0	0	0	0	0	0	0	0	0	0		0
CRE103	77.8544	1028.75	84.1576	8.5568	43.9334	406.747	1650	0.623485	acetylcholine	5813094811, 607899687, 670297553, 705787638, 766126400	CRE103	0	0	0	0	0	0	0	0	35	0	0	0	0	0	0	0	0	0	0	0	0	0	0	0	0	0	0	0	0	0	0	13	0	0	0	0		0
LHPD5d1	131.89	800.29	158.79	29.68	65.7	320.65	1507	0.531048	acetylcholine	387568523, 5813055800	LHPD5d1	231	41	0	0	0	0	30	86	0	0	53	0	174	11	43	0	0	11	0	0	0	0	0	0	0	0	0	0	0	0	0	0	0	0	0	12		0
LHPV5e1	31.05	1398.79	71.67	6.96	9.14	37.4	1555	0.899538	acetylcholine	299082033, 328611004	LHPV5e1	19	47	129	13	67	35	0	0	0	20	131	228	0	0	0	0	0	0	101	0	0	0	0	0	0	0	0	0	0	0	0	17	0	0	0	0		0
LHPD2a4_c	65.6712	196.984	62.618	3.5906	22.1407	126.996	478	0.4121	acetylcholine	5813021728, 640963092	LHPD2a4_c	0	0	0	11	0	0	0	0	0	0	0	0	0	0	0	0	0	0	0	0	0	0	0	0	0	0	0	0	0	0	0	0	0	0	0	0		0
FR2	98.4421	806.824	52.1598	28.0624	38.0491	58.4623	1082	0.745679	acetylcholine	1002658094, 1138696627, 1168331947, 1169005415, 355651857, 356670712, 357663649, 449749647, 508447812, 508793106, 539759172	FR2	0	0	0	0	0	0	0	0	0	0	0	0	0	0	0	0	0	0	0	0	0	0	0	0	0	0	0	0	0	0	0	0	0	0	0	0		0
SMP568_d	24.84	457.51	30.79	1.89	9.35	90.61	615	0.743931	acetylcholine	329646990, 5813020857	SMP568_d	0	35	0	0	0	0	0	0	0	0	0	0	0	0	0	0	0	0	0	0	0	0	0	0	0	0	0	0	0	0	0	78	0	0	0	0		0
LHPD2a4_b	28.1	167.8	26.53	2.62	11.21	49.74	286	0.586713	acetylcholine	449205588, 768192947	LHPD2a4_b	0	0	0	75	0	0	0	0	0	0	0	0	0	0	0	0	0	47	0	0	0	0	0	0	0	0	0	0	26	0	0	0	0	0	0	0		0
SMP179	132.995	512.041	70.107	8.4114	39.9903	301.456	1065	0.480789	acetylcholine	298603730, 424193116	SMP179	0	0	0	0	0	0	0	0	0	0	0	0	0	0	0	0	0	0	0	0	0	0	0	0	0	0	0	0	0	11	0	0	0	0	0	0		0
SLP129_c	46.1255	655.736	36	24.1187	36.2457	180.774	979	0.669801	acetylcholine	482417237, 575426742, 581652283, 583015749	SLP129_c	0	0	0	0	0	0	0	0	0	0	0	0	0	0	0	0	0	0	0	0	0	0	0	0	0	0	0	0	0	0	0	0	0	0	0	0		0
LHPV5e3	176.883	3135.4	224.012	17.3805	36.4951	206.833	3797	0.825756	acetylcholine	579575594, 642504699	LHPV5e3	21	0	0	154	0	0	0	0	0	0	130	0	0	0	0	0	0	0	0	0	0	0	0	0	0	0	0	0	22	0	0	0	0	0	0	0		0
SMP556	22.7635	360.624	46.5538	5.4414	42.8701	268.747	747	0.482763	acetylcholine	579536041, 798939240	SMP556	0	0	0	0	12	0	0	0	0	0	0	0	0	0	0	0	0	0	0	0	0	0	0	0	0	0	0	0	0	0	0	0	0	0	0	0		0
LHPV4m1	18.95	1133.13	23.39	1.78	11.73	66.03	1255	0.902885	acetylcholine	518899665	LHPV4m1	48	0	21	42	17	0	0	148	0	0	76	0	0	0	54	10	13	23	0	0	0	0	77	0	0	0	0	0	0	0	0	0	0	0	0	0		0
SMP551	52.7602	935.685	89.5748	10.1416	86.605	570.233	1745	0.536209	acetylcholine	328274638, 392757094	SMP551	0	0	0	0	0	0	0	0	0	0	0	0	0	0	0	0	0	0	0	0	0	0	0	0	0	0	0	0	0	0	0	0	0	0	0	0		0
CRE066	103.498	870.416	140.862	31.1022	130.896	582.226	1859	0.468217	acetylcholine	1046506683, 5812983811, 760690116, 917919724	CRE066	0	0	0	0	0	0	0	0	0	0	0	0	0	0	0	0	0	0	0	0	0	0	0	0	0	0	0	0	0	0	106	0	0	0	0	0		0
SMP548	20.2902	771.529	35.0184	9.8834	64.4212	480.858	1382	0.55827	acetylcholine	297580589	SMP548	0	0	0	0	0	0	0	0	0	0	0	0	0	0	0	0	0	0	0	27	0	0	0	0	0	0	0	0	0	0	0	0	0	0	0	0		0
SMP550	21.1949	1083.93	20.1014	5.2518	40.4016	232.123	1403	0.772579	acetylcholine	452689494	SMP550	0	0	0	0	0	0	0	0	0	0	0	0	0	0	0	0	0	0	0	0	0	0	0	0	0	0	0	0	0	0	0	0	0	0	0	0		0
SMP178	181.99	1088.05	162.79	36.7	91.91	412.55	1974	0.551193	acetylcholine	422738252, 581099105	SMP178	0	0	0	0	0	0	0	0	0	15	0	0	0	0	0	0	0	0	0	0	0	0	0	0	0	0	0	0	0	0	42	0	0	49	0	0		0
LHAD1b5	114.4	1007.94	66.51	16.11	21.67	114.38	1341	0.751628	acetylcholine	421957539, 513404289, 517842578, 5813067728, 5901195496,	LHAD1b5	0	0	0	0	0	0	431	0	0	0	0	0	23	0	0	0	0	0	0	0	0	0	0	0	42	0	0	0	0	0	0	0	0	0	0	0		0
SMP568_b	28.99	390.93	72.41	5.49	11.25	92.91	602	0.649407	acetylcholine	5812980109, 826136822	SMP568_b	0	0	0	0	0	0	0	0	0	0	0	0	0	0	0	0	0	0	0	0	0	0	0	0	0	0	0	0	0	0	0	53	0	0	0	0		0
AVLP494	76.5194	1003.91	70.0041	8.8155	21.1407	116.615	1297	0.774021	acetylcholine	1653139353, 5813053805, 948851462	AVLP494	0	0	0	0	0	0	0	0	0	0	0	0	0	0	0	0	0	0	0	0	0	0	0	0	0	0	0	0	0	0	0	0	0	0	0	0		0
SLP244	183.813	956.355	50.4028	13.0355	41.5136	165.88	1411	0.677786	acetylcholine	297533212, 298214577	SLP244	0	0	0	0	0	0	0	0	0	0	0	0	0	0	0	0	0	0	0	0	0	0	0	0	0	0	0	0	0	0	0	0	0	0	0	0		0
CL129	23.7	1365.01	154.88	6.17	12.1	28.15	1590	0.858491	acetylcholine	478591447, 613191512	CL129	0	0	0	0	0	0	0	0	0	0	0	0	0	0	0	0	0	0	0	0	98	0	0	0	0	0	0	0	0	0	0	0	0	0	0	26		0
aIPg3	32.72	381.5	34.58	4.44	23.77	159	636	0.599833	acetylcholine	5813098975, 768590452	aIPg3	0	0	0	0	0	0	0	0	0	0	0	0	0	0	0	0	0	0	0	0	0	0	0	0	0	0	0	0	0	0	0	0	0	0	0	0		0
SMP247	27.87	146.5	22.17	2.08	10.7	68.68	278	0.526978	acetylcholine	519940322, 549252548, 550617370	SMP247	0	0	0	146	37	0	0	0	0	0	0	10	0	0	0	0	0	0	0	0	0	0	0	0	0	0	0	0	0	0	0	0	0	0	0	0		0
SMP197	6.48	200.02	13.91	0.63	13.88	123.08	358	0.558715	acetylcholine	610611010, 673733299, 700991872	SMP197	0	0	19	0	0	0	0	0	0	0	89	80	0	0	0	0	0	0	0	0	0	0	0	0	0	0	0	0	0	0	0	0	0	0	0	0		0
SMP577	84.6588	895.818	140.49	10.4675	112.913	643.653	1888	0.47448	acetylcholine	298258399, 5813063137	SMP577	0	0	0	0	0	0	0	0	0	26	0	0	0	0	0	0	0	0	0	0	0	0	0	0	0	0	0	0	0	0	0	0	0	0	0	0		0
CRE065	18.5028	242.16	24.2862	0.8055	13.3067	91.9389	391	0.619335	acetylcholine	5813134055, 893723183, 985805061	CRE065	54	0	0	0	0	0	0	0	0	0	71	0	0	0	0	0	0	0	0	0	0	28	0	0	0	0	0	0	0	0	0	0	0	0	0	0		0
SMP173	24.6901	353.039	25.3206	3.5595	23.2474	192.144	622	0.567586	acetylcholine	546765551, 612988814, 642024743, 643717679	SMP173	0	0	0	0	0	0	0	0	0	0	26	0	0	0	0	0	0	0	0	0	0	12	0	0	0	0	0	0	0	0	0	0	0	0	0	0		0
SLP400	30.7	452.35	36.03	14.8	28.09	167	729	0.620533	acetylcholine	296199149, 326888609, 484134987	SLP400	0	0	0	0	0	0	0	0	0	0	0	19	0	0	0	0	0	0	0	0	0	0	0	0	0	0	0	0	0	0	0	0	0	0	0	0		0
SLP423	128.665	630.419	56.8177	17.7313	22.8736	87.4932	944	0.667817	acetylcholine	268237554, 298935111, 299267723, 327511994	SLP423	0	0	0	0	0	0	0	0	0	0	0	0	0	0	0	0	0	0	0	0	0	0	0	0	0	0	0	0	0	0	0	0	0	0	0	0		0
SMP175	48.06	1208.16	192.7	9.34	69.83	356.92	1885	0.64093	acetylcholine	485249150, 5813055949	SMP175	0	0	0	0	0	0	0	0	0	0	109	0	0	0	0	0	0	0	0	0	0	0	0	0	0	0	0	0	0	0	0	0	0	43	0	12		0
SMP568_c	83.7207	333.502	113.362	4.0911	31.2575	120.067	686	0.486154	acetylcholine	736109737, 862697175	SMP568_c	0	0	0	0	0	0	0	0	24	0	0	0	0	0	0	0	0	0	0	0	0	0	0	0	0	0	0	0	0	0	0	49	0	0	0	0		0
SLP440	82.01	502.91	59.91	26.34	32.78	143.06	847	0.593747	acetylcholine	328870472	SLP440	0	20	0	0	0	0	0	0	0	0	0	0	0	0	0	0	0	0	0	0	0	0	0	0	0	0	0	0	0	0	0	0	0	0	0	0		0
SMP568_a	19.47	77.16	31.8	2.02	6.88	38.67	176	0.438409	acetylcholine	671660941, 672697926, 734754585, 924737391	SMP568_a	0	0	0	11	0	0	0	0	0	0	22	0	0	0	0	0	0	0	0	0	0	0	0	0	0	0	0	0	0	0	0	39	0	0	0	0		0
AVLP496	72.2094	1040.67	112.313	26.8117	38.3931	194.603	1485	0.700788	acetylcholine	1013636956, 1073314797, 5812982994, 5813058350, 5813097634	AVLP496	0	0	0	0	0	0	0	0	0	0	0	0	0	0	0	0	0	0	0	0	0	0	0	0	0	0	0	0	0	0	0	0	0	0	0	0		0
LHAD1b2_d	20.16	468.21	27.24	11.26	11.11	71	609	0.768843	acetylcholine	544107243, 730562988	LHAD1b2_d	258	13	0	0	10	0	253	0	0	0	59	53	152	0	0	0	0	0	0	0	0	0	0	0	11	0	0	0	0	0	0	0	0	0	0	0		0
SMP256	14.4551	302.064	21.44	4.2737	16.8008	95.9661	455	0.663878	acetylcholine	483720758	SMP256	0	0	0	0	0	0	0	0	0	0	0	0	0	0	0	0	0	0	0	0	0	0	0	0	0	0	0	0	0	0	0	0	0	0	0	15		0
SLP388	35.54	843.83	37.95	7.29	43.5	301.89	1270	0.664433	acetylcholine	297917459, 298258611	SLP388	0	68	0	0	0	0	0	0	0	0	0	0	0	0	0	0	0	0	19	0	0	0	0	0	0	0	0	0	0	0	0	0	0	0	0	0		0
SIP053	66.5262	978.653	60.6219	4.3719	38.5447	231.282	1380	0.709169	acetylcholine	5901197108, 611288467, 611663250, 643679015	SIP053	11	0	0	0	0	0	0	0	0	0	19	27	0	0	0	0	0	0	0	0	0	0	0	0	0	0	0	0	0	0	0	0	0	0	0	0		0
IB017	122.459	1500.29	154.177	17.833	51.7777	155.463	2002	0.749396	acetylcholine	5813022375, 5813053712	IB017	0	0	0	0	0	0	0	0	0	0	0	0	0	0	0	0	0	0	0	0	0	0	0	0	0	0	0	0	0	0	0	0	0	0	0	29		0
CRE070	26.17	425.06	51.91	5.54	26.51	167.82	703	0.604629	acetylcholine	675136878	CRE070	0	0	0	0	0	0	0	0	0	0	0	0	0	0	0	0	0	0	0	0	0	0	0	0	0	0	0	0	0	0	31	0	0	0	0	10		0
SIP090	10.58	826.55	10.97	1.09	5.07	21.75	876	0.943539	acetylcholine	456833888	SIP090	64	0	0	0	0	0	0	0	0	0	138	142	0	0	51	0	0	0	0	0	0	0	0	0	0	0	0	0	0	0	0	0	0	0	0	0		0
AVLP493	38.5348	685.186	27.8164	6.6904	17.9569	131.816	908	0.75461	acetylcholine	612336669, 888146447	AVLP493	0	0	0	0	0	0	0	0	0	0	12	0	0	0	0	0	0	0	0	0	0	0	0	0	0	0	0	0	0	0	0	0	0	0	0	0		0
CRE076	150.3	1753.6	163.17	11.05	67.44	499.44	2645	0.662987	acetylcholine	669965108, 734599550	CRE076	0	0	0	0	0	0	0	0	38	0	0	0	0	0	0	0	10	10	0	0	0	0	0	0	0	0	75	0	0	0	0	0	0	0	0	0		0
SLP234	20.067	1009.04	12.0739	5.493	6.986	12.3376	1066	0.946569	acetylcholine	424379864	SLP234	0	0	0	0	0	0	0	0	0	0	0	0	0	0	0	0	0	0	0	0	36	0	0	0	0	0	0	0	0	0	0	0	0	0	0	0		0
LHPD2a4_a	39.1512	441.564	34.9307	11.1167	21.0485	89.1885	637	0.693194	acetylcholine	417834021, 449205611	LHPD2a4_a	0	0	0	131	0	0	0	0	0	0	0	0	0	0	0	0	0	0	0	0	0	0	0	0	0	0	0	0	10	0	0	0	0	0	0	0		0
SLP424	94.3387	343.04	33.0657	23.1026	13.1286	46.3243	553	0.620326	acetylcholine	267227062, 328546621, 362007054, 5901224041	SLP424	0	0	0	0	0	0	0	0	0	0	0	0	0	0	0	0	0	0	0	0	0	0	0	0	0	0	0	0	0	0	0	0	0	0	0	0		0
SMP570	26.9121	253.092	28.5146	3.1086	20.9233	231.45	564	0.448744	acetylcholine	5813039962, 861683024, 892376241	SMP570	0	0	0	0	0	0	0	0	0	0	0	0	0	0	0	0	0	0	0	0	10	0	0	0	0	0	0	0	0	0	0	0	0	0	0	0		0
SMP471	40.59	444.69	43.61	5.3	23.19	102.62	660	0.673773	acetylcholine	550988122, 580732172	SMP471	0	0	0	0	0	0	0	14	0	0	0	0	0	0	0	0	0	0	0	0	0	0	0	0	0	0	0	0	0	0	0	0	0	0	0	25		0
CRE083	112.466	1364.27	78.1161	20.0072	35.9646	157.176	1768	0.771646	acetylcholine	330319983, 361341837, 362866879, 423749262, 424582092, 454935401	CRE083	0	0	0	0	0	0	0	0	0	0	0	24	0	0	0	0	0	0	0	0	0	0	0	0	0	0	0	0	0	0	0	0	0	0	0	0		0
SLP439	132.364	550.006	61.5685	12.2811	53.0292	221.751	1031	0.533469	acetylcholine	5813020785	SLP439	0	0	0	0	0	0	0	0	0	0	0	0	0	0	0	0	0	0	0	34	0	0	0	42	0	0	0	0	0	0	0	0	0	0	0	0		0
SIP029	393.7	1307.67	82.2664	34.6717	40.5651	258.124	2117	0.617701	acetylcholine	5813049380, 608241077	SIP029	0	10	10	129	0	0	0	0	0	0	70	38	0	0	0	0	0	0	11	0	0	0	0	0	0	0	0	0	0	0	0	0	0	0	0	0		0
CRE020	37.9785	206.227	26.2699	1.0161	11.5791	70.9296	354	0.582562	acetylcholine	797194962, 827889434	CRE020	0	0	0	85	45	0	0	0	0	0	0	0	0	0	0	0	0	0	0	0	0	0	0	0	0	0	0	0	0	0	0	0	0	0	0	0		0
LHPV7c1	36.28	897.33	32.92	6.38	16.06	68.03	1057	0.84894	acetylcholine	667857582	LHPV7c1	0	0	0	0	257	0	0	0	0	0	0	0	0	0	0	0	12	0	0	0	47	0	0	0	0	0	0	0	0	0	0	0	0	0	0	0		0
SMP048	199.823	4184.34	423.695	31.3693	42.9499	181.821	5064	0.826292	acetylcholine	488922181, 581746661	SMP048	0	0	0	0	0	0	0	0	0	0	0	0	0	0	0	0	0	0	0	0	0	0	0	0	0	0	0	0	0	0	0	0	0	0	0	0		0
SMP157	43.0197	940.576	107.912	3.3299	21.9195	86.2425	1203	0.781859	acetylcholine	421041565, 485589846	SMP157	0	0	0	0	0	0	0	0	0	0	0	0	0	0	0	0	0	0	0	0	0	0	0	0	0	0	0	0	0	0	0	0	0	0	0	0		0
M_lvPNm25	11.3891	726.241	10.5302	6.747	14.8069	28.2852	798	0.910077	acetylcholine	1411784734, 639276164	M_lvPNm25	0	0	0	0	0	0	0	0	0	0	0	0	0	0	0	0	0	0	0	0	0	0	0	0	0	0	0	0	0	0	0	0	0	0	0	0		0
SIP088	65.08	251.22	9.91	2.23	6.26	28.3	363	0.692066	acetylcholine	331011085	SIP088	0	193	0	0	0	18	0	0	0	0	0	23	245	0	0	0	0	0	54	0	0	0	0	84	13	0	0	0	0	0	0	0	0	0	0	0		0
SMP454	164.504	4652.35	406.311	44.8367	109.6	428.399	5806	0.8013	acetylcholine	326253554, 328010530	SMP454	0	0	0	0	0	0	0	0	0	0	0	0	0	0	0	0	0	0	0	0	0	0	0	0	0	0	0	0	0	0	0	0	0	0	0	0		1
SIP070	111.436	722.322	97.2487	21.8226	76.451	339.72	1369	0.527627	acetylcholine	487191620, 5812980514, 5813021600, 5813078504	SIP070	0	0	0	21	0	0	0	0	0	0	0	0	0	0	0	0	0	0	0	0	0	0	0	0	0	0	0	0	0	0	0	0	0	0	0	0		0
CRE089	70.56	469.39	54.46	5.32	28.35	190.93	819	0.573119	acetylcholine	5813022370, 673047760, 675784199, 702199343, 702708540, 733399215, 767329844, 983905050	CRE089	0	0	0	104	0	0	0	0	0	0	12	11	0	0	0	0	0	0	0	0	0	0	0	0	0	0	0	0	0	0	0	0	0	0	0	0		0
SMP005	9.39	354.82	30.24	2.15	14.92	125.48	537	0.660745	acetylcholine	582696254, 614081109	SMP005	46	0	0	0	0	0	0	0	0	0	0	0	0	0	0	0	0	0	0	0	0	0	0	0	0	0	0	0	0	0	0	0	0	0	0	0		0
CRE105	102.814	672.009	72.9004	10.2404	17.9659	75.0707	951	0.706634	acetylcholine	328601956, 859735285	CRE105	0	0	0	0	39	0	0	0	0	45	61	0	0	0	0	0	0	0	0	0	0	0	0	0	0	0	0	0	0	0	0	0	0	36	0	0		0
CL326	106.796	423.561	113.573	12.0638	77.5714	302.436	1036	0.408842	acetylcholine	5812983110, 767123688	CL326	0	0	0	0	0	0	0	0	0	0	0	0	0	0	0	0	0	0	0	0	0	0	0	0	0	0	0	0	0	0	0	0	0	0	0	0		0
SMP030	9.33	207.6	21.74	0.59	10.31	74.44	324	0.640721	acetylcholine	612712334	SMP030	252	0	0	0	34	0	0	14	0	0	36	0	0	0	0	0	0	0	0	0	0	0	18	0	0	0	0	0	0	0	0	0	0	0	0	0		0
CRE005	305.084	1679.08	367.555	61.4463	196.507	797.328	3407	0.492832	acetylcholine	551751981, 552101431, 5813058320, 644450565	CRE005	0	0	0	0	13	0	0	0	0	0	0	0	0	0	0	0	0	0	0	0	0	0	0	0	0	0	0	0	0	0	0	0	0	0	0	0		0
CRE078	11.64	373.03	20.69	2.55	20.34	131.75	560	0.666125	acetylcholine	639995972, 640104852, 643859327, 675767414	CRE078	0	0	0	0	0	0	0	0	0	0	0	0	0	0	0	0	0	0	0	0	0	0	0	0	0	0	0	0	0	0	40	0	0	0	0	0		0
LHAD2b1	10.19	968.02	22.81	2.29	4.41	15.27	1023	0.946265	acetylcholine	702364805	LHAD2b1	0	0	0	0	0	0	0	0	0	0	0	0	0	0	0	0	0	0	0	0	0	0	0	0	0	0	0	0	32	0	0	0	0	0	0	0		0
LHAD1b6_a	33.8179	504.482	38.3414	9.3342	23.6905	209.333	819	0.615974	acetylcholine	425471220, 452336897, 512765816	LHAD1b6_a	11	0	0	0	0	0	23	0	0	0	0	0	0	0	0	0	0	0	0	0	0	0	0	0	0	0	0	0	0	0	0	0	0	0	0	0		0
SMP031	15.74	315.94	33.02	1.39	15.12	86.8	468	0.675071	acetylcholine	517838849, 579230376	SMP031	206	51	0	10	165	28	36	0	0	0	106	0	100	0	0	0	0	0	0	0	0	32	12	0	0	0	0	0	0	0	0	0	0	0	0	0		0
LHPD2c2	27.0176	483.325	31.2306	10.8384	33.4126	183.176	769	0.628511	acetylcholine	418516266, 540967864, 674096140, 703702863	LHPD2c2	0	0	0	0	0	0	0	33	0	0	13	30	0	0	0	0	0	0	0	0	0	0	10	0	0	0	0	0	0	0	0	0	0	0	0	0		0
SMP003	7.97	369.97	28.54	4.88	17.16	124.49	553	0.669011	acetylcholine	516780722, 547158593	SMP003	115	0	0	0	0	0	0	0	0	0	0	0	0	0	0	0	0	0	0	0	0	0	0	0	0	0	0	0	0	0	0	0	0	0	0	0		0
LHAD1b2_a	28.27	308.42	30.58	9.66	12.77	60.3	450	0.685378	acetylcholine	544107335, 5813013202, 606461310, 673426956, 769199010, 824349873	LHAD1b2_a	240	0	0	0	11	0	84	0	0	0	62	47	79	0	0	0	0	0	0	0	0	0	0	0	0	0	0	0	0	0	0	0	0	0	0	0		0
SMP004	15.3	354.3	55.27	1.91	19.44	138.78	585	0.605641	acetylcholine	582700300, 612367371	SMP004	368	0	0	0	0	0	0	0	0	0	22	0	0	0	0	0	0	0	0	0	0	0	0	0	0	0	0	0	0	0	0	0	0	0	0	0		0
CRE069	109.08	247.57	82.75	10.02	39.51	153.06	642	0.385629	acetylcholine	612004584, 767187563	CRE069	0	0	0	0	43	0	0	0	0	0	0	0	0	0	0	0	0	0	0	0	0	0	26	0	0	0	0	0	0	0	0	0	0	0	0	0		0
SLP321	141.206	1373.45	57.2475	18.8144	12.5895	38.6912	1642	0.83645	acetylcholine	422337400, 452698565	SLP321	0	0	0	0	0	0	0	0	0	0	0	0	0	0	0	0	0	0	0	0	0	0	0	0	0	0	0	0	0	0	0	0	0	0	0	0		0
CRE018	98.3207	453.722	70.4028	6.8021	17.1439	58.6085	705	0.643577	acetylcholine	550621853, 703059097, 705462899	CRE018	0	0	0	14	0	0	0	0	136	0	0	0	0	0	0	0	0	0	0	0	0	0	0	0	0	0	0	0	0	0	0	0	0	0	0	0		0
AVLP032	19.63	401.34	29.41	18.16	126.09	112.38	707	0.567658	acetylcholine	487968933, 550962648	AVLP032	0	0	0	0	0	0	0	0	0	0	0	0	0	0	0	0	0	0	0	0	0	0	0	0	0	0	0	0	0	33	0	0	0	0	0	0		0
LAL037	78.9969	223.166	47.3793	2.7047	10.6735	38.0798	401	0.556523	acetylcholine	734088804, 765810666	LAL037	0	0	0	115	19	0	0	0	0	0	0	0	0	0	0	0	0	0	0	0	0	0	0	0	0	0	0	0	0	0	0	22	0	0	0	0		0
SIP071	143.707	770.05	122.392	10.8322	72.5556	438.464	1558	0.494255	acetylcholine	424089598, 516844782, 518861029	SIP071	30	0	0	14	0	0	0	0	0	0	24	0	0	0	0	0	0	0	0	0	0	0	0	0	0	0	0	0	0	0	0	0	0	0	0	0		0
CRE001	10.5216	184.227	17.2398	0.7801	9.4609	42.7702	265	0.695198	acetylcholine	5901192948	CRE001	102	0	0	0	72	0	0	0	0	0	60	0	0	0	0	0	0	0	0	0	0	0	11	0	0	0	0	0	0	0	0	0	0	0	0	0		0
SIP076	169.907	599.904	103.024	29.1466	81.758	399.26	1383	0.43377	acetylcholine	297921808, 298586733, 298591075, 298931489, 299617484, 299617849, 299954300, 299958695, 5813092260,	SIP076	0	0	0	0	0	0	0	0	0	0	0	0	0	0	0	0	0	0	0	0	0	0	0	0	0	0	0	0	0	0	0	0	0	0	0	0		0
CRE064	12.26	224.35	21.78	1.5	13.18	100.93	374	0.599866	acetylcholine	5812981240, 737512824, 799583417	CRE064	0	0	0	0	0	0	0	0	0	0	57	0	0	0	0	0	0	0	0	0	0	0	0	0	0	0	0	0	0	0	33	0	0	0	0	0		0
CRE077	201.7	715.35	303.02	13.0601	33.6984	120.171	1387	0.515754	acetylcholine	611629428, 672192070	CRE077	0	0	22	0	0	0	0	0	0	0	201	115	0	0	0	0	0	0	0	0	0	0	30	0	0	0	0	0	0	0	0	0	0	0	0	0		0
SMP112	36.0369	638.673	74.9755	3.0282	13.6768	40.6088	807	0.791417	acetylcholine	641709938, 674108802, 706508078	SMP112	0	0	0	0	0	0	0	0	187	0	0	0	0	0	0	0	0	0	0	0	0	0	0	0	0	0	0	0	0	0	0	44	0	0	0	0		0
CRE049	28.6346	438.534	41.3516	5.7385	31.2751	191.466	737	0.595026	acetylcholine	613040803	CRE049	0	0	0	0	0	0	0	0	0	0	0	0	0	0	0	0	0	0	0	0	0	0	0	0	0	0	0	0	0	0	50	0	0	0	0	0		0
LHAV7b1	50.0249	773.143	28.5555	7.1545	16.5505	49.5711	925	0.835831	acetylcholine	423351806, 513741732, 517479202, 576161592, 577464071	LHAV7b1	0	0	0	0	0	0	0	0	0	0	0	0	0	0	0	0	0	0	0	0	100	0	0	0	0	0	0	0	0	0	0	0	0	0	0	0		0
LAL198	50.3858	1161.9	123.419	4.3818	33.3462	122.564	1496	0.776674	acetylcholine	1016506999, 985472994	LAL198	0	0	10	0	0	0	0	12	0	0	43	0	0	0	0	0	0	0	0	0	0	0	0	0	0	0	0	0	0	0	0	0	0	0	0	0		0
SIP049	72.1	480.96	35.25	10.8	21.43	120.46	741	0.649069	acetylcholine	449209971, 578914626, 642693620	SIP049	0	0	0	131	0	0	0	0	0	0	0	0	0	0	0	0	0	0	0	0	0	0	0	0	0	0	0	0	0	0	0	0	0	0	0	0		0
LHAV9a1_b	25.94	283.994	45.3977	4.1502	11.7372	68.7808	440	0.645441	acetylcholine	642660081, 671307834	LHAV9a1_b	0	0	0	0	0	0	0	49	0	0	0	0	0	0	0	0	18	10	0	0	0	0	16	0	0	0	0	0	0	0	0	0	0	0	0	0		0
SMP549	28.02	469.58	32.54	5.56	50.57	327.72	914	0.513769	acetylcholine	329566197, 455229034	SMP549	0	0	0	0	0	18	0	0	0	0	12	0	73	0	0	0	0	0	0	0	0	0	0	0	0	0	0	0	0	0	0	0	0	0	0	0		0
CRE024	208.83	915.72	643.98	6.96	34.4	142.1	1952	0.469121	acetylcholine	1015143077, 675528661	CRE024	0	0	0	0	0	0	0	0	0	0	106	0	0	0	0	0	0	0	0	0	0	0	0	0	0	0	0	0	0	0	244	0	0	0	0	0		0
SMP026	74.15	866.62	60.7	6.89	54.12	232.51	1295	0.66921	acetylcholine	298599271, 5813068707	SMP026	0	0	0	0	0	0	0	0	0	0	0	0	40	0	0	0	0	0	0	0	0	0	0	0	0	0	0	0	0	0	0	0	0	0	0	0		0
SLP242	20.1711	314.02	23.9405	5.322	14.3074	81.2389	459	0.68414	acetylcholine	546765753, 637540087	SLP242	0	0	0	0	0	0	0	0	0	0	0	25	0	0	0	0	0	0	0	0	0	0	0	0	0	0	0	0	0	0	0	0	0	0	0	0		0
SIP069	112.219	579.816	106.609	13.9849	51.4594	319.911	1184	0.489709	acetylcholine	610981555, 643329030	SIP069	14	0	0	73	41	0	0	0	0	0	0	0	0	0	0	0	0	0	0	0	0	0	0	0	0	0	0	0	0	0	0	0	0	0	0	0		0
LHPV10b1	36.448	987.048	51.0341	14.9045	19.8762	63.6887	1173	0.841474	acetylcholine	604709727	LHPV10b1	0	0	0	0	15	0	0	87	0	0	43	0	0	0	0	0	0	0	0	0	0	0	0	0	0	0	0	0	0	0	0	0	0	0	0	0		0
SIP074	69.5914	485.733	64.9246	14.8061	35.5645	151.38	822	0.590916	acetylcholine	423364866, 610243047, 642651049, 735798583	SIP074	0	0	0	0	0	0	0	0	12	0	0	0	0	0	0	0	0	0	0	0	0	0	0	0	0	0	0	0	0	0	0	0	0	0	0	0		0
FS2	258.553	1505.51	351.144	67.9277	176.96	623.909	2984	0.504526	acetylcholine	1009038430, 1009375668, 1009768220, 1072865814, 1103840073, 1132824528, 1167593263, 1168302280, 1197251489, 1199069208, 1199383911, 1229309429, 1261130127, 5813015963, 5813016568, 5813037881, 5813041405, 5813059875, 702536798, 764800337, 858030363, 915605935, 915610732, 915947054, 916288692, 916646694, 920441518, 977002807, 977335118, 978004433	FS2	0	0	0	0	0	0	0	0	0	0	0	0	0	0	0	0	0	0	0	0	0	0	0	0	0	0	0	0	0	0	0	0	0	0	0	0		0
CRE092	128.504	1323.75	90.772	18.4067	37.3978	167.165	1766	0.749578	acetylcholine	5812983510, 642323384, 736632557, 764412104, 765975775, 799249679, 800618162	CRE092	0	0	0	0	0	0	0	25	0	0	108	0	0	0	0	0	14	0	0	0	0	0	0	0	0	0	0	0	0	0	0	0	0	0	0	0		0
SMP408_d	5.21	132.57	10.51	0.83	12.99	73.88	236	0.561761	acetylcholine	297917364, 297934349, 298241038, 298266903, 298944479	SMP408_d	0	0	0	0	0	22	0	0	0	0	0	0	0	0	0	0	0	0	0	76	0	0	0	0	0	0	0	0	0	0	0	0	0	0	0	0		0
SLP163	43.448	387.544	23.4755	4.0825	15.9231	62.5269	537	0.721683	acetylcholine	389929872, 390564245, 5813056243	SLP163	0	0	0	0	0	0	0	0	0	0	0	0	0	0	0	0	0	0	0	0	0	0	0	0	0	0	0	0	0	0	0	0	0	0	0	0		0
LHPD2a1	27.9635	1140.56	37.1593	16.3869	12.4373	49.4883	1284	0.88829	acetylcholine	542634516, 571666434, 573329304, 573337611, 640963556	LHPD2a1	0	0	0	0	0	0	0	0	0	0	0	68	0	0	0	0	0	0	0	0	0	0	0	0	0	0	0	0	0	0	0	0	0	0	0	0		0
CRE063	30.401	222.075	48.9477	3.2013	16.0088	88.3661	409	0.542971	acetylcholine	640617445, 672002621	CRE063	0	0	0	0	0	0	0	0	11	0	0	0	0	0	0	0	0	0	0	0	0	0	0	0	0	0	0	0	0	0	12	0	0	0	0	0		0
SMP032	6.32	159.56	16.66	0.62	6.44	55.4	245	0.651265	acetylcholine	362299997	SMP032	67	0	0	0	0	0	0	0	0	0	0	0	0	0	0	0	0	0	0	0	0	0	0	0	0	0	0	0	0	0	0	0	0	0	0	0		0
SIP067	22.6462	662.449	20.827	2.3833	28.0409	174.654	911	0.727167	acetylcholine	5813020993	SIP067	0	0	0	0	0	0	0	0	0	0	0	0	0	0	11	0	0	0	0	43	0	0	0	0	0	0	0	0	0	0	0	0	0	0	0	0		0
CL123	89.9839	461.794	77.0102	44.2316	44.2878	160.692	878	0.525961	acetylcholine	1013040388, 855147657, 920951427, 948260484, 978971398,	CL123	0	0	0	0	0	0	0	0	0	0	0	0	0	0	0	0	0	0	0	0	0	0	0	0	0	0	0	0	0	0	0	0	0	0	0	0		0
SMP195_b	20.98	134.11	24.26	2.38	14.19	132.09	328	0.408859	acetylcholine	456156825, 5812980747	SMP195_b	0	0	0	0	0	0	0	0	0	0	47	45	0	0	0	0	0	0	0	0	0	14	0	0	0	0	0	0	0	10	0	0	0	0	0	0		0
CRE080	84.16	1104.46	117.52	17.26	36.88	114.71	1475	0.748792	acetylcholine	5813022811, 5901193671, 5901213819, 736140238, 800286386, 829050526, 829059301	CRE080	0	0	0	0	0	0	0	0	0	493	150	85	0	0	0	0	0	0	0	0	0	130	0	0	0	0	0	0	0	102	59	0	0	0	0	15		0
LHPD4c1	29.71	841.44	64.04	12.04	15.25	102.52	1065	0.790085	acetylcholine	421641859	LHPD4c1	242	215	0	0	0	0	0	0	0	0	0	34	0	0	0	0	0	0	16	0	0	0	0	0	0	0	0	0	0	0	0	0	0	0	0	0		0
CRE071	81.9679	299.028	57.9546	7.3245	31.9556	144.77	623	0.47998	acetylcholine	1013066710	CRE071	0	0	0	0	0	0	0	0	0	0	0	0	0	0	0	0	0	0	0	0	0	0	0	0	0	0	0	0	0	0	0	0	0	0	0	106		0
SMP258	12.6942	351.416	25.2438	2.0538	14.8118	67.7804	474	0.741384	acetylcholine	425462513, 517885151	SMP258	0	0	0	0	0	0	0	0	0	0	0	21	0	0	0	0	0	0	0	0	0	0	0	0	0	0	0	0	0	0	0	0	0	0	0	0		0
SIP072	20.16	139.85	18.33	2.81	16.54	90.31	288	0.48559	acetylcholine	485132675, 516504076	SIP072	0	0	0	37	0	0	0	0	0	0	0	0	0	0	0	0	0	0	0	0	0	0	0	0	0	0	0	0	0	0	0	0	0	0	0	0		0
LHAD1b3	104.9	406.7	63.33	32.59	28.52	92.95	729	0.557895	acetylcholine	451382570, 455828904, 5813047019	LHAD1b3	0	0	0	0	0	0	14	0	0	0	0	0	140	0	0	0	0	0	0	0	0	0	0	0	0	0	0	0	0	0	0	0	0	0	0	0		1
SMP152	10.55	522.62	21.03	3.01	26.27	119.54	703	0.743393	acetylcholine	455155337, 922810839	SMP152	0	0	0	0	0	0	0	32	0	0	0	0	0	0	0	0	0	0	0	0	0	0	0	0	0	0	0	0	0	0	10	0	0	0	0	0		0
ATL018	257.174	798.806	441.46	143.241	229.912	441.407	2312	0.345504	acetylcholine	455483094, 577697202, 578034170, 727968539	ATL018	0	0	0	53	18	0	0	0	0	0	0	0	0	0	0	0	0	0	0	27	0	0	0	0	0	0	0	0	0	0	0	0	0	0	0	0		0
LHAD1b2_c	66.3274	400.156	45.199	20.8146	24.7225	148.781	706	0.566793	acetylcholine	543321179, 574040939, 5813052205, 762274975	LHAD1b2_c	40	0	0	0	0	0	13	0	0	0	11	40	0	0	0	0	0	0	0	0	0	0	0	0	0	0	0	0	0	0	0	0	0	0	0	0		1
LAL185	153.59	686.8	81.01	17.43	66.93	179.25	1185	0.579573	acetylcholine	5813079192, 985826737	LAL185	0	0	0	0	0	0	0	0	0	0	0	0	0	0	0	0	0	0	0	0	0	95	10	0	0	0	0	0	0	0	0	0	0	0	0	63		0
LHAD1c2	22.1337	679.974	32.2071	10.1992	19.0457	81.4401	845	0.804703	acetylcholine	424776680, 424780893, 424781115, 425121959, 551298257	LHAD1c2	0	0	0	0	0	0	0	0	0	0	0	36	0	0	0	0	0	0	0	0	0	0	0	0	0	0	0	0	0	0	0	0	0	0	0	0		0
LHPD2a2	28.2454	1164.45	26.7479	13.9785	17.5687	87.0132	1338	0.870289	acetylcholine	448869118, 5813014640, 5813129453, 699178922	LHPD2a2	0	0	0	0	0	0	0	0	0	0	47	53	0	0	0	0	0	0	0	0	0	0	0	0	0	0	0	0	0	0	0	0	0	0	0	0		0
LHAD1b2_b	45.7942	377.977	31.0414	8.5134	14.42	117.253	595	0.635256	acetylcholine	483017681, 573683438, 5813022459	LHAD1b2_b	0	0	0	0	0	0	12	0	0	0	0	0	0	0	0	0	0	0	0	0	0	0	0	0	0	0	0	0	0	0	0	0	0	0	0	0		0
LAL137	53.5159	1207.73	79.4393	1.9278	18.6605	53.7249	1415	0.853521	acetylcholine	5901221584, 7112622044	LAL137	0	0	0	0	0	0	0	0	0	0	0	0	0	0	0	0	0	0	0	0	0	0	0	0	0	0	0	30	0	0	10	0	35	0	0	22		0
LAL155	331.242	937.81	446.447	98.9669	106.755	387.78	2309	0.406154	acetylcholine	1048250312, 1111757266, 863698974, 925241334	LAL155	0	0	0	0	0	0	0	0	0	0	0	0	0	0	0	0	0	0	0	0	0	0	0	0	0	0	104	0	0	0	39	77	115	0	0	0		0
SMP174	14.8001	205.991	45.484	4.8605	16.4094	97.4546	385	0.535042	acetylcholine	1232344382, 767541763, 831325065	SMP174	0	0	0	0	0	0	0	0	0	0	0	0	0	0	0	0	0	0	0	0	0	0	0	0	0	0	0	0	0	0	0	0	0	0	0	0		0
M_lvPNm24	48.0263	1586.49	25.213	7.9756	18.0106	23.2875	1709	0.928313	acetylcholine	1671952694, 577542489	M_lvPNm24	0	0	0	0	0	0	0	0	0	0	0	0	0	0	0	0	0	0	0	0	0	0	0	0	0	0	0	0	0	0	0	0	0	0	0	0		0
CRE082	11.2816	396.772	18.9783	2.8526	6.7443	26.3712	463	0.856959	acetylcholine	454787848, 767321428	CRE082	0	0	0	0	0	0	0	0	0	0	28	22	0	0	0	0	0	0	0	0	0	0	0	0	0	0	0	0	0	0	0	0	0	0	0	0		0
LHPD2a9	13.1085	401.461	11.4245	2.8219	9.0495	37.1343	475	0.845182	acetylcholine	760268555	LHPD2a9	0	0	0	0	0	0	0	0	0	0	54	0	0	0	0	0	0	0	0	0	0	0	0	0	0	0	0	0	0	0	0	0	0	0	0	0		0
SIP051	87.616	469.35	26.5569	16.565	12.3627	36.5494	649	0.72319	acetylcholine	387809633, 390641835, 449209892	SIP051	0	0	0	0	0	52	0	0	0	0	0	0	0	0	0	0	0	0	0	0	0	0	0	0	0	0	0	0	0	0	0	0	0	0	0	0		10
SLP391	28.8	326.42	26.72	5.43	22.39	136.24	546	0.597839	acetylcholine	298612190	SLP391	0	0	0	0	0	58	0	0	0	0	0	0	51	0	0	0	0	0	0	0	0	0	0	0	0	0	0	0	0	0	0	0	0	0	0	0		0
LHAV3k1	54.9064	1172.56	33.463	21.418	10.9844	31.6729	1325	0.884947	acetylcholine	424716408	LHAV3k1	0	168	0	0	0	0	0	0	0	0	0	0	0	0	0	0	0	0	70	0	0	0	0	19	0	0	0	0	0	0	0	0	0	0	0	0		0
LHPV2h1	33.56	290.21	17.54	35.87	12.48	10.34	400	0.725525	acetylcholine	543766436	LHPV2h1	0	0	0	0	0	0	0	0	0	0	0	0	112	0	0	0	0	0	0	0	0	0	0	0	0	0	0	0	0	0	0	0	0	0	0	0		2
M_spPN4t9	37.47	1150.5	24.04	4.55	6.98	11.46	1235	0.931579	acetylcholine	1316245799	M_spPN4t9	0	0	0	0	0	0	0	0	0	0	0	0	0	0	0	0	0	0	0	0	0	0	0	0	0	0	0	0	0	0	0	0	0	0	0	0		0
LAL110	3.18	129.58	26.43	1.5	7.59	45.72	214	0.605514	acetylcholine	1263037872, 831321033, 894422413, 953855039, 956820684,	LAL110	0	0	0	0	0	0	0	0	0	0	0	0	0	0	0	0	0	0	0	0	0	0	0	0	0	0	0	43	0	0	0	0	0	0	0	10		0
SLP156	95.1544	693.182	40.9201	15.4411	21.3687	91.9334	958	0.723572	acetylcholine	328861072, 357859600, 358877435, 390599010	SLP156	0	0	0	0	0	0	0	0	0	0	0	0	0	0	0	0	0	0	0	0	0	0	0	0	0	0	0	0	0	0	0	0	0	0	0	0		0
LHAV3j1	222.54	672.31	45.91	17.57	17.54	53.12	1029	0.653369	acetylcholine	297851977	LHAV3j1	0	0	0	0	0	0	0	0	0	0	0	0	0	0	0	0	0	0	14	0	0	0	0	76	0	0	0	0	0	0	0	0	0	0	0	0		0
AVLP562	264.07	1547.24	348.826	11.423	75.3726	228.065	2475	0.625149	acetylcholine	1450016008, 5812983831	AVLP562	0	0	0	0	0	0	0	0	0	0	0	0	0	0	0	0	0	0	0	0	0	0	0	0	0	0	0	0	0	0	0	0	18	0	0	0		0
SMP504	419.68	1095.08	158.75	29.81	91.36	450.31	2245	0.487788	acetylcholine	424793122, 610113424	SMP504	0	0	0	0	0	0	0	0	0	0	0	0	0	12	0	0	0	0	0	0	0	0	0	0	0	0	0	0	0	0	43	0	0	0	0	0		0
CRE087	70.9339	506.44	22.7722	7.5783	14.0236	67.2517	689	0.735037	acetylcholine	517682957, 548575149	CRE087	0	0	0	0	0	0	0	0	0	0	0	34	0	0	0	0	0	0	0	0	0	0	0	0	0	0	0	0	0	0	0	0	0	0	0	0		0
AVLP563	179.94	598.77	188.51	27.85	200.26	570.67	1766	0.339054	acetylcholine	5813057461, 735470654	AVLP563	0	0	0	0	0	0	0	0	0	0	0	0	0	0	0	0	0	0	0	0	0	0	0	0	0	40	0	0	0	0	0	0	0	0	23	0		0
SMP586	16.9545	424.093	20.5007	4.9435	12.4556	25.0522	504	0.841455	acetylcholine	484821546	SMP586	0	0	0	0	0	0	0	11	0	0	42	46	0	0	0	0	0	0	0	0	0	41	0	0	0	0	0	0	0	14	0	0	0	0	0	0		0
SMP002	16.98	204.55	33.37	0.37	11.36	85.37	352	0.581108	acetylcholine	550638250	SMP002	352	0	0	0	0	0	0	0	0	0	0	0	0	0	0	0	0	0	0	0	0	0	0	0	0	0	0	0	0	0	0	0	0	0	0	0		0
LAL129	209.06	1504.8	284.66	15.27	56.7	154.5	2225	0.676318	acetylcholine	1112443807, 1144761556	LAL129	0	0	0	0	0	0	0	25	0	0	0	0	0	0	0	0	0	0	0	0	0	0	0	0	0	0	0	0	0	0	0	0	0	0	0	242		0
LHPV6a1	425.559	1854.07	144.193	79.2465	28.2277	68.7015	2600	0.713105	acetylcholine	480590337, 480594756, 480599437, 480945354, 481627444, 511625768, 511626068, 511626286, 511966731, 543684107, 574468840, 5813012322, 5813039907, 758154573	LHPV6a1	0	0	0	0	0	0	183	0	0	0	0	0	66	0	0	0	0	0	0	0	0	0	0	0	0	0	0	0	0	0	0	0	0	0	0	0		1
SMP254	189.288	1051.59	226.971	20.678	140.48	469.991	2099	0.500996	acetylcholine	5813069497, 762037782	SMP254	0	0	0	0	0	0	0	0	0	0	0	0	0	0	0	0	0	0	0	0	0	0	0	0	0	0	0	13	0	17	0	0	0	0	0	0		0
LHAV9a1_c	14.69	120.04	18.9	1.18	9.38	76.82	241	0.498071	acetylcholine	793728667, 794406234, 953755666	LHAV9a1_c	0	0	0	0	0	0	0	0	0	0	0	0	0	0	0	0	0	0	0	0	0	0	0	0	0	0	0	0	0	0	38	0	0	0	0	0		0
LAL154	61.96	949.44	182.48	6.14	75.45	337.55	1613	0.58861	acetylcholine	799279899, 830034406	LAL154	0	0	0	0	0	0	0	76	0	0	0	0	0	0	0	0	0	0	0	0	0	10	0	0	0	0	0	22	0	0	0	0	0	0	0	0		0
LHAD1k1	55.07	264.39	23.1	11.3	6.36	17.77	378	0.699463	acetylcholine	327838570	LHAD1k1	0	0	0	0	0	0	35	0	0	0	0	0	63	0	0	0	0	0	0	0	0	0	0	0	0	0	0	0	0	0	0	0	0	0	0	0		0
SMP238	101.84	665.93	66.61	8.75	35.45	280.42	1159	0.574573	acetylcholine	417221397	SMP238	0	0	0	0	0	0	0	0	0	0	0	0	0	0	0	0	0	0	0	0	0	0	0	0	0	0	0	0	0	0	26	0	0	16	0	0		1
SMP199	6.05	686.94	17.94	1.32	20.66	146.09	879	0.781502	acetylcholine	361005850, 547002880	SMP199	0	0	0	0	0	0	0	0	0	0	0	0	0	0	0	0	0	0	0	30	0	0	0	0	0	0	0	0	0	0	0	0	0	0	0	0		1
SMP347	57.48	938.9	101.38	11.69	78.13	529.43	1717	0.546823	acetylcholine	266187342, 266187383, 267896360, 326888433, 326888675, 328269766, 331006655, 390361224	SMP347	0	0	0	0	0	0	0	0	0	0	0	14	0	0	0	0	0	0	0	191	0	0	0	0	0	0	0	0	0	0	0	0	0	0	0	0		0
CRE098	60.81	402.59	67.54	19.04	23	76.03	649	0.620314	acetylcholine	550275987, 580093930, 704777224, 766846796	CRE098	0	0	0	0	0	0	0	0	0	87	0	18	0	0	0	0	0	0	0	0	0	0	28	0	36	0	0	0	0	12	10	0	0	0	0	0		0
CRE003_b	121.022	488.738	97.0179	13.5815	27.9391	190.701	939	0.520488	acetylcholine	5812980915, 730687491, 760703506, 794462286	CRE003_b	0	0	0	0	0	0	0	0	0	0	0	0	0	0	0	0	0	0	0	0	0	0	0	0	0	0	0	0	0	0	0	0	0	0	0	0		0
SIP003_a	37.7065	350.084	42.8513	5.8298	13.9303	118.598	569	0.615262	acetylcholine	546507208, 576519520, 577205270, 607894716	SIP003_a	0	0	0	0	0	0	0	0	13	0	0	0	0	0	0	0	0	0	0	0	0	0	0	0	0	0	0	0	0	0	0	0	0	0	0	0		0
LHAV9a1_a	25.1092	326.915	37.4172	2.8183	8.4484	39.2919	440	0.742989	acetylcholine	579235017, 607195856	LHAV9a1_a	0	0	0	0	0	0	0	83	0	0	0	0	0	0	0	0	15	0	0	0	0	0	0	0	0	0	0	0	0	0	0	0	0	0	0	0		0
SMP358	27.02	328.87	109.44	8.5	23.49	124.69	622	0.528721	acetylcholine	5812982052, 5813108129, 607251100	SMP358	55	0	0	0	0	0	0	0	0	0	0	0	0	0	0	0	0	0	0	0	0	0	0	0	0	0	0	0	0	0	0	0	0	0	0	0		0
SLP073	11.8146	354.914	10.3829	4.4693	5.0425	26.3771	413	0.859355	acetylcholine	423416887	SLP073	0	0	0	0	0	0	0	0	0	0	0	0	0	0	0	0	0	0	0	0	0	0	0	0	0	0	0	0	0	0	0	0	0	0	0	0		0
CRE067	159.513	231.893	101.602	18.3073	80.8228	171.862	764	0.303525	acetylcholine	1016166622, 1110640084	CRE067	0	0	0	0	0	0	0	0	0	0	0	0	0	0	0	0	0	0	0	0	0	10	0	0	0	0	11	0	0	0	90	0	0	0	0	0		0
CRE097	69.666	321.443	52.1616	15.5903	17.6937	89.4453	566	0.567921	acetylcholine	1160807120, 487882254, 549049148, 767313008	CRE097	0	0	0	0	0	0	0	0	0	0	0	0	0	0	0	0	0	0	0	0	0	0	0	0	0	0	0	0	0	0	0	0	0	0	0	0		0
LHAV6a9	80.484	284.039	53.4709	138.27	36.952	75.784	669	0.424572	acetylcholine	329581637, 360254511, 391954490	LHAV6a9	0	0	0	0	0	0	0	0	0	21	0	0	22	0	0	0	0	0	0	0	0	0	0	0	179	0	0	0	0	0	0	0	0	0	0	0		2
LAL030_a	72.4714	757.734	80.8652	6.2108	14.9153	48.8039	981	0.772409	acetylcholine	674446014, 676133767, 801283077, 862010850	LAL030_a	79	0	0	0	0	0	0	0	0	0	0	0	0	0	0	0	0	0	0	0	0	0	0	0	0	0	0	0	0	0	0	0	0	0	0	18		0
CRE093	150.011	789.272	73.6794	14.375	39.7016	200.961	1268	0.622454	acetylcholine	639974538, 643350227, 767486231, 795982617, 827911067, 857538779	CRE093	0	0	0	0	0	0	0	0	0	0	0	0	0	0	0	0	0	0	0	0	0	0	0	0	0	0	0	0	0	25	0	0	0	0	0	0		0
SMP353	9.44	271.64	15.94	2.2	18.57	95.2	413	0.65774	acetylcholine	424443911	SMP353	0	0	0	0	0	0	67	0	0	0	0	0	0	0	0	0	0	0	0	0	0	0	0	0	0	0	0	0	0	0	0	0	0	0	0	0		0
CRE003_a	155.452	866.806	90.9378	11.8126	28.4837	171.508	1325	0.654193	acetylcholine	1015479949, 546196205, 610299911, 610981584, 737486877	CRE003_a	0	0	0	0	0	0	0	0	0	0	0	0	0	0	0	0	0	0	0	0	0	0	0	0	0	0	0	0	0	0	0	0	0	0	0	0		0
SMP154	174.139	1141.22	265.433	22.5785	175.261	712.368	2491	0.458137	acetylcholine	550404663, 5813089157	SMP154	0	0	0	0	0	0	0	0	0	0	0	0	0	0	0	0	0	0	0	0	0	16	0	0	0	0	0	15	0	0	0	0	0	0	0	0		0
SIP019	20.8377	256.317	17.1872	3.4816	11.0377	54.1386	363	0.706108	acetylcholine	362041442	SIP019	0	0	0	0	0	124	0	0	0	0	0	0	0	0	0	0	0	0	14	0	0	0	0	60	47	0	0	0	0	0	0	0	0	0	0	0		0
SMP194	18.69	125.11	8.22	1.01	5.98	42.99	202	0.619356	acetylcholine	613338546	SMP194	0	0	0	0	0	0	0	0	0	12	23	0	11	0	0	0	0	0	0	0	0	0	0	0	0	0	0	0	0	26	23	0	0	0	0	0		0
LAL160	67.4356	1082.39	43.3143	44.0372	23.8329	48.9907	1310	0.826251	acetylcholine	1049247113, 1600489166	LAL160	0	0	0	0	0	0	0	0	0	0	0	0	0	0	0	0	0	0	0	0	0	0	0	0	0	0	0	0	0	13	174	0	0	0	0	0		0
SMP196	17.7047	212.639	19.626	2.2396	9.5492	70.2412	332	0.64048	acetylcholine	329978745, 519591210	SMP196	0	0	0	0	0	0	0	0	0	0	34	0	0	0	0	0	0	0	0	0	0	0	0	0	0	0	0	0	0	0	0	0	0	0	0	0		0
IB049	60.6544	543.233	184.025	16.1075	48.8905	261.089	1114	0.487642	acetylcholine	730692294, 794466376	IB049	0	0	0	0	0	0	0	0	0	0	0	0	0	0	0	0	0	0	0	0	0	0	0	0	0	0	42	16	0	0	0	30	124	0	0	0		0
SMP405	30.0854	365.039	31.6479	3.4884	21.1926	201.546	653	0.559019	acetylcholine	331343089, 5901213624	SMP405	0	0	0	0	0	0	0	0	0	0	0	0	0	0	0	0	0	0	0	34	0	0	0	0	0	0	0	0	0	0	0	0	0	0	0	0		0
LHPD2b1_a	23.653	505.986	23.4774	3.198	8.1037	25.5823	590	0.857603	acetylcholine	509928512, 548872750, 5813089504	LHPD2b1_a	0	24	0	0	0	0	0	0	0	0	0	75	0	0	0	0	0	0	0	0	0	0	0	0	0	0	0	0	0	0	0	0	0	0	0	0		1
SLP406	8.0678	13.4383	3.2825	2.807	4.8129	3.5916	36	0.373285	acetylcholine	512377806	SLP406	0	0	0	0	0	0	102	0	0	0	0	0	0	0	0	0	0	0	0	0	0	0	0	0	0	0	0	0	0	0	0	0	0	0	0	0		0
ATL027	41.5384	794.888	258.207	11.5116	23.5508	81.3046	1211	0.65639	acetylcholine	1020608279, 1050685061	ATL027	0	0	0	0	0	0	0	0	0	0	0	0	0	0	0	0	0	0	0	0	0	0	0	0	0	0	0	0	0	0	0	0	0	0	0	153		0
LAL039	130.215	270.901	36.8085	7.2459	20.0674	55.7625	521	0.519963	acetylcholine	1139240289, 1511645270, 703050435	LAL039	0	0	0	64	0	0	0	0	0	0	0	0	0	0	0	0	0	0	0	0	0	0	0	0	0	0	130	0	0	0	0	116	0	0	0	0		0
CRE086	33.9221	475.963	79.3746	3.3475	16.601	82.7918	692	0.687808	acetylcholine	1298985697, 769924974, 895091952	CRE086	0	0	0	0	0	0	0	0	0	0	0	0	0	0	0	0	0	0	0	0	0	0	0	0	0	0	0	0	0	0	0	0	0	0	0	89		0
SMP184	234.857	1192.37	120.588	41.3489	58.4551	162.383	1810	0.658767	acetylcholine	234630133, 388954086	SMP184	0	0	0	0	0	0	0	0	0	0	0	0	0	0	0	0	0	0	0	0	0	0	0	0	0	0	0	0	0	0	0	0	0	0	0	0		0
LAL033	55.4675	243.677	32.59	6.2231	12.2081	40.8342	391	0.623215	acetylcholine	5813090253, 5901222244	LAL033	0	0	0	0	0	0	0	0	0	0	0	0	0	0	0	0	0	0	0	0	0	0	0	0	0	0	102	0	0	0	0	27	24	0	0	0		0
CRE088	57.5927	754.835	33.2783	9.2589	14.7124	90.3233	960	0.786286	acetylcholine	671657343, 672524871, 762698149	CRE088	0	0	36	0	0	0	0	0	0	0	13	0	0	0	0	0	11	0	0	0	0	0	0	0	0	0	0	0	0	0	0	0	0	0	0	0		0
PLP161	57.2349	427.29	58.5048	17.1088	32.8794	166.982	760	0.562223	acetylcholine	920869856, 920873167	PLP161	0	0	0	0	0	0	0	0	0	0	0	0	0	0	0	0	0	0	0	0	26	0	0	0	0	0	0	0	0	0	0	0	0	0	0	0		0
SIP023	26.8997	206.221	54.4709	3.3718	6.4305	24.6059	322	0.640439	acetylcholine	642387775	SIP023	68	0	0	0	0	0	0	0	0	0	65	0	0	0	0	0	0	0	0	0	0	0	0	0	0	0	0	0	0	0	0	0	0	0	0	0		0
SMP354	27.46	306.59	21.55	4.17	30.45	280.78	671	0.456915	acetylcholine	389307767, 390003153, 5813010748	SMP354	0	0	0	0	0	0	268	0	0	0	0	0	311	0	0	0	0	0	0	56	0	0	0	0	0	0	0	0	0	0	0	0	0	0	0	0		0
CL303	130.453	618.088	155.764	19.2024	74.1915	278.301	1276	0.484395	acetylcholine	5813022257	CL303	0	0	0	0	0	0	0	0	0	0	0	0	0	0	0	0	0	0	0	0	0	0	0	0	0	0	0	0	0	0	0	0	0	0	0	0		0
SIP030	12.19	78.48	21.85	1.66	7.26	59.56	181	0.433591	acetylcholine	360660371, 362020664	SIP030	0	0	0	0	0	0	0	0	0	0	16	19	0	0	0	0	0	0	0	0	0	0	0	0	0	0	0	0	0	0	0	0	0	0	0	0		0
AVLP477	290.212	839.016	291.685	24.09	64.9652	219.033	1729	0.485261	acetylcholine	769263962, 800373114	AVLP477	0	0	0	0	0	0	0	0	0	0	0	0	0	0	0	0	0	0	0	0	0	0	0	0	0	0	0	0	0	0	0	0	0	0	0	0		0
LAL115	47.8373	512.812	50.3861	7.6866	12.7103	42.5675	674	0.760849	acetylcholine	858906840,	LAL115	0	0	0	0	0	0	0	0	0	0	0	0	0	0	0	0	0	0	0	0	0	0	0	0	0	0	217	0	0	0	0	100	0	0	0	0		0
AL-MBDL1	1.03	3.1732	1.5749	0.5396	0.3634	1.319	8	0.396645	acetylcholine	608922563	AL-MBDL1	217	0	0	0	0	0	0	199	0	0	101	41	0	0	10	0	0	0	0	0	0	0	10	0	0	0	0	0	0	0	0	0	0	0	0	0		0
LHCENT11	51.5726	1737.95	30.3281	13.2012	11.0254	31.9255	1876	0.926411	acetylcholine	639585968	LHCENT11	129	0	0	18	0	0	0	26	0	0	139	108	0	0	0	0	0	0	0	0	0	38	0	0	0	0	0	0	0	0	0	0	0	0	0	16		0
LAL119	11.9647	737.059	16.8747	4.6888	13.7092	10.7032	795	0.927119	acetylcholine	1667886676	LAL119	0	0	0	0	0	0	0	0	0	0	0	0	0	0	0	0	0	0	0	0	0	0	0	0	0	0	0	50	0	0	0	0	105	0	0	10		0
CRE068	23.34	117.03	40.32	2.86	17.06	67.39	268	0.436679	acetylcholine	1047887562, 984794932	CRE068	0	0	0	0	0	0	0	0	0	0	0	0	0	0	0	0	0	0	0	0	0	0	0	0	0	0	0	0	0	0	51	0	0	0	0	0		0
LAL161	73.4869	900.082	42.7587	37.4902	23.5789	56.6039	1134	0.793723	acetylcholine	1465630554, 1669255212	LAL161	0	0	0	0	0	0	0	0	0	0	0	0	0	0	0	0	0	0	0	0	0	0	0	0	0	0	0	0	0	0	158	0	0	0	0	0		0
LHPV5a1_a	46.37	608.25	26.65	25.63	10.32	29.81	747	0.814224	acetylcholine	573333284, 573683455, 604368022, 609941228	LHPV5a1_a	0	47	0	0	0	0	0	0	0	0	0	0	0	0	0	0	0	0	0	0	0	0	0	0	0	0	0	0	0	0	0	0	0	0	0	0		1
CRE096	44.7872	162.023	14.9652	4.9551	10.4264	45.8431	283	0.57252	acetylcholine	736507123, 891111303	CRE096	0	0	0	0	0	0	0	0	0	34	0	0	0	0	0	0	0	0	0	0	0	0	12	0	0	0	14	0	0	23	0	0	0	0	0	0		0
SMP603	0.7321	53.2672	1.5522	0.3684	0.5104	0.5698	57	0.934511	acetylcholine	454136171	SMP603	218	0	0	0	0	0	0	0	0	0	39	0	0	0	0	0	0	0	0	0	0	0	0	0	0	0	0	0	0	0	0	0	0	0	0	47		0
PLP130	233.492	1089.44	43.5403	15.7618	15.9787	33.785	1432	0.760784	acetylcholine	545385576	PLP130	0	0	0	0	0	0	0	0	0	0	0	0	0	0	0	0	13	0	0	0	35	0	0	0	0	0	0	0	0	0	0	0	0	0	0	0		0
DNa03	91.7546	1242.19	235.129	16.6567	13.9165	35.3561	1635	0.759747	acetylcholine	1139909038	DNa03	0	0	0	0	0	0	0	0	0	0	0	0	0	0	0	0	0	0	0	0	0	0	0	0	0	0	55	106	0	0	0	108	70	0	0	0		0
LAL018	30.5814	943.354	152.548	15.152	13.9015	47.4634	1203	0.784168	acetylcholine	1140249804	LAL018	0	0	0	0	0	0	0	0	0	0	0	0	0	0	0	0	0	0	0	0	0	0	0	0	0	0	0	58	0	0	0	0	127	0	0	0		0
LAL169	48.5654	584.855	20.4705	10.3488	11.7184	19.0417	695	0.841518	acetylcholine	1437682098	LAL169	0	0	0	0	0	0	0	0	0	0	0	0	0	0	0	0	0	0	0	0	0	0	0	0	0	0	0	20	0	0	0	0	169	0	0	41		0
VES013	51.3727	1037.59	66.5169	50.0319	15.698	22.7861	1244	0.834079	acetylcholine	1978573010	VES013	0	0	0	0	0	0	0	0	0	0	0	0	0	0	0	0	0	0	0	0	137	0	0	0	0	0	0	0	0	0	0	0	0	0	0	0		0
CRE072	47.4833	464.225	38.558	5.9813	35.0817	84.6704	676	0.686724	acetylcholine	1106862090, 517169460	CRE072	0	0	0	0	0	0	0	0	0	262	44	31	0	0	0	0	0	0	0	0	0	0	24	19	15	0	0	0	0	56	0	0	0	0	0	0		0
LT85	203.694	586.23	71.5923	45.9405	19.5182	29.0249	956	0.613211	acetylcholine	1193448112,	LT85	0	0	0	0	0	0	0	0	0	0	0	0	0	0	0	0	0	0	0	0	153	0	0	0	0	0	0	0	0	0	0	0	0	0	0	0		0
LAL159	36.44	954.8	52.65	13.53	24.27	23.3	1105	0.86408	acetylcholine	1300276335, 1605842920	LAL159	0	0	0	0	0	0	0	0	0	0	0	0	0	0	0	0	0	0	0	0	0	83	0	0	0	0	0	151	0	37	61	0	35	0	0	0		0
LAL172	68.7259	816.159	23.4842	4.3093	12.6708	20.6513	946	0.862747	acetylcholine	1469403612, 1729935421	LAL172	0	0	0	0	0	0	0	0	0	0	0	0	0	0	0	0	0	0	0	0	0	0	0	0	0	0	293	0	0	0	0	121	315	0	0	0		0
LAL196	86.3355	436.626	38.4462	19.5179	25.3178	45.7571	652	0.669671	acetylcholine	1479281491, 1510653932, 1603109870, 1667571719, 1788974593	LAL196	0	0	0	0	0	0	0	0	0	0	0	0	0	0	0	0	0	0	0	0	0	10	0	0	0	0	0	43	0	0	0	0	108	0	0	0		0
LAL171	84.1459	861.885	35.0922	6.1507	10.4671	19.2591	1017	0.847478	acetylcholine	1605455071, 1729637685	LAL171	0	0	0	0	0	0	0	0	0	0	0	0	0	0	0	0	0	0	0	0	0	0	0	0	0	0	354	0	0	0	0	126	302	0	0	0		0
LAL135	110.001	881.496	37.1627	48.4936	26.1547	49.6918	1153	0.764524	acetylcholine	1607548068, 1628062270	LAL135	0	0	0	0	0	0	0	0	0	0	0	0	0	0	0	0	0	0	0	0	0	0	0	0	0	0	156	0	0	0	0	39	103	0	0	0		0
LAL173	39.486	646.445	6.7252	16.1667	9.6312	11.5457	730	0.885541	acetylcholine	1760318324, 1942806972	LAL173	0	0	0	0	0	0	0	0	0	0	0	0	0	0	0	0	0	0	0	0	0	0	0	0	0	0	133	26	0	0	0	83	181	0	0	0		0
LAL174	33.7173	708.943	11.2727	10.6547	12.2489	10.1637	787	0.900817	acetylcholine	1788983330, 1943147567	LAL174	0	0	0	0	0	0	0	0	0	0	0	0	0	0	0	0	0	0	0	0	0	0	0	0	0	0	156	26	0	0	0	68	151	0	0	0		0
SMP352	101.801	262.355	46.9105	7.3585	20.7655	110.81	550	0.477008	acetylcholine	266187532, 266528078, 266528086, 296194535, 328593903, 5813009926	SMP352	0	0	0	0	0	0	0	0	0	0	0	0	0	0	0	0	0	0	0	0	0	0	0	38	0	0	0	0	0	0	0	0	0	0	0	0		0
SLP396	43.9405	311.085	56.6205	13.5436	26.5514	153.259	605	0.51419	acetylcholine	298607679, 5813039906	SLP396	0	0	0	0	0	0	0	0	0	0	0	0	0	0	0	0	0	0	0	174	0	0	0	0	0	0	0	0	0	0	0	0	0	0	0	0		0
IB048	99.6772	507.236	238.543	17.948	63.6167	318.978	1246	0.407092	acetylcholine	575664331, 666572081	IB048	0	0	0	0	0	0	0	0	0	0	0	0	0	0	0	0	0	0	0	0	0	0	0	0	0	0	173	40	0	0	0	59	216	0	0	0		0
LAL183	18.3294	938.336	9.9804	10.637	7.9553	14.762	1000	0.938336	acetylcholine	5813078438, 915105102	LAL183	0	0	0	0	0	0	0	0	0	0	0	0	0	0	0	0	0	0	0	0	0	0	0	0	0	0	48	18	0	0	0	60	40	0	0	0		0
SMP384	14.51	44.02	29.46	360.92	653.23	1540.86	2643	0.582997	dopamine	548712377, 5813020996	SMP384	0	0	0	0	0	0	0	0	0	0	23	13	0	0	0	0	0	0	0	0	0	0	0	0	0	0	0	0	0	0	0	0	0	0	0	20		0
SMP503	42.05	93.21	34.69	431.45	354.18	4030.43	4986	0.808348	dopamine	361312808, 5813020840	SMP503	0	0	0	0	0	0	0	0	0	0	0	0	0	0	0	0	0	0	0	0	48	0	0	0	0	0	0	0	0	0	0	0	0	0	0	0		0
PPL107	76.91	219.11	89.8	374.13	2060.62	5532.44	8353	0.662329	dopamine	424918786, 859265651	PPL107	0	0	0	430	0	0	0	0	0	0	0	0	0	67	14	0	0	0	0	0	0	0	0	0	0	0	18	0	0	0	0	11	0	13	0	0		0
SIP087	72.91	102.45	62.85	1457.78	1085.71	3868.31	6650	0.5817	dopamine	487187476, 5812980746	SIP087	0	0	248	530	0	0	0	0	0	0	221	158	0	76	55	0	0	0	0	0	0	0	43	0	0	0	10	0	0	0	0	0	0	0	0	0		0
SMP193	27.0059	347.401	25.4459	3.6748	64.1946	362.278	830	0.436479	dopamine	328956505, 360349882, 487899426	SMP193	0	0	0	0	0	0	0	0	0	0	0	0	0	0	0	0	0	0	0	0	0	0	0	0	0	0	0	0	0	0	0	0	0	0	0	0		0
SMP385	61.52	144.2	121.22	400.8	778.74	3902.51	5409	0.721486	dopamine	5813083780, 766186252	SMP385	29	0	0	31	0	0	0	0	0	0	0	0	0	0	0	0	0	0	0	0	0	0	0	0	0	0	0	0	0	0	0	0	0	0	0	27		0
PAL02	27.1281	99.202	39.3097	25.0392	295.884	1649.44	2136	0.772208	dopamine	455500416, 486544396	PAL02	131	0	0	0	0	0	0	0	0	58	0	0	0	0	0	0	0	0	0	0	0	12	0	0	0	0	0	0	0	40	0	0	0	0	0	0		0
SMP195_a	27.92	220.15	36.01	2.89	27.03	232.01	546	0.424919	dopamine	486496648, 641645610, 765797569	SMP195_a	0	0	10	0	11	0	0	0	0	0	111	76	0	0	0	0	0	0	0	0	0	20	0	0	0	0	0	0	0	0	0	0	0	0	0	0		0
5-HTPMPD01	29.17	44.88	25.25	385.78	303.98	2047.95	2837	0.721869	dopamine	297230760, 297908801	5-HTPMPD01	0	0	0	0	0	0	0	0	0	0	0	10	61	0	0	0	0	0	15	0	0	0	0	14	0	0	0	0	0	0	0	0	0	0	0	15		1
SLP129_b	20.2063	222.045	28.6628	11.4756	28.6014	269.009	580	0.463808	dopamine	392645419, 5813021223	SLP129_b	0	0	0	0	0	0	0	0	0	0	0	0	42	0	0	0	0	0	0	0	0	0	0	0	0	0	0	0	0	0	0	0	0	0	0	0		0
SMP145	216.835	172.029	119.132	303.336	1115.06	1666.61	3593	0.463849	dopamine	484130600, 577554935	SMP145	0	0	0	0	0	0	0	0	0	0	0	0	0	0	0	0	0	0	0	0	0	0	0	0	0	0	0	0	0	0	0	0	0	0	0	0		0
SMP142	191.113	163.956	89.2781	299.104	1160.08	1658.47	3562	0.4656	dopamine	549597974, 735941254	SMP142	0	0	0	0	0	0	0	0	0	0	0	0	0	0	0	0	0	0	0	0	0	0	0	0	0	0	0	0	0	0	0	0	0	0	0	0		0
SMP377	150.587	547.523	151.292	9.9254	102.467	643.205	1605	0.400751	dopamine	580326857, 672723441, 673405506, 673741976, 674420122, 704785256, 737491087	SMP377	0	0	0	16	0	0	0	0	0	0	0	0	0	0	0	0	0	0	0	0	0	0	0	0	0	0	0	0	0	0	0	0	0	0	0	0		0
SLP129_a	12.5038	106.041	14.4089	4.6898	12.4707	111.886	262	0.427047	dopamine	5813012028	SLP129_a	0	0	0	0	0	0	0	0	0	0	0	0	35	0	0	0	0	0	0	0	0	0	0	0	0	0	0	0	0	0	0	0	0	0	0	0		0
SMP181	32.8	101.25	45.11	440.56	838.43	2577.87	4036	0.638716	dopamine	328943204, 330640044	SMP181	0	0	0	0	0	0	0	0	0	0	0	0	0	0	0	0	0	0	0	0	0	0	0	0	0	0	0	0	0	0	0	0	0	42	0	0		5
FB1H	113.858	402.403	200.44	336.982	1926.12	4550.2	7530	0.604276	dopamine	519046655, 5813062858	FB1H	12	0	0	96	37	0	0	0	0	0	12	0	0	0	0	0	0	0	0	0	0	0	15	0	0	0	0	0	0	0	0	0	0	0	0	0		0
SMP589	129.662	137.539	187.754	34.4192	287.024	772.602	1549	0.498774	dopamine	516283789, 5813026705	SMP589	0	0	0	0	0	0	0	0	0	0	44	0	0	0	0	0	0	0	0	0	0	0	0	0	0	0	0	0	0	0	0	0	0	0	0	0		0
SMP588	125.534	195.588	182.193	145.218	499.169	1993.3	3141	0.634606	dopamine	1173029301, 5813071068, 638040562, 642046803	SMP588	0	0	0	0	0	0	0	0	0	0	0	0	0	0	0	0	0	0	0	0	0	0	0	0	0	0	0	0	0	0	0	0	0	0	0	10		0
FB4O	148.673	270.271	514.762	136.736	784.055	792.503	2647	0.299396	dopamine	1016192580, 1131826900, 768224139, 922146751	FB4O	0	0	0	0	0	0	0	0	0	0	0	0	0	0	0	0	0	0	0	0	0	14	48	0	0	0	0	0	0	23	0	0	0	0	0	0		0
PPL108	94.5763	173.868	111.742	364.62	743.17	3167.02	4655	0.680349	dopamine	5812981791, 800303089	PPL108	0	0	0	0	0	0	0	54	0	0	0	0	0	0	0	0	0	0	0	0	0	34	0	0	0	45	0	0	0	0	0	0	0	0	43	26		0
PPM1201	38.2384	159.49	33.4434	649.185	461.517	3917.13	5259	0.744842	dopamine	792040520, 950229431	PPM1201	0	0	0	0	0	0	45	0	0	0	0	0	0	0	0	0	0	0	0	0	317	0	0	0	0	0	0	0	0	0	0	0	0	0	0	0		0
FB4Y	38.293	262.299	78.5085	133.041	846.055	2152.8	3511	0.61316	dopamine	1008378448, 5813027016	FB4Y	0	0	0	0	0	0	0	0	0	0	0	0	0	0	0	0	0	0	0	0	0	0	0	0	0	0	0	0	0	0	0	0	0	56	0	27		0
FB5AB	109.796	638.624	157.519	11.0212	229.094	849.946	1996	0.425825	dopamine	5813047763, 946304488	FB5AB	0	0	0	0	19	0	0	0	0	0	79	136	0	0	0	0	0	0	0	0	0	0	0	0	0	0	0	0	0	0	0	0	0	0	0	0		0
FB4M	41.6677	358.552	65.0239	157.958	1817.07	2692.73	5133	0.524592	dopamine	1131827390, 1289359184	FB4M	0	0	0	0	0	0	0	0	0	0	0	0	0	0	0	0	0	0	0	0	0	0	0	0	0	0	0	0	0	0	0	0	0	11	0	73		0
CRE042	2065.59	64	335.35	13.24	38.3	79.52	2596	0.795682	gaba	641688553, 703900244	CRE042	0	0	416	150	136	0	0	0	0	0	229	0	0	0	0	0	0	0	0	0	0	0	68	0	0	0	86	11	0	0	0	74	0	0	0	0		0
LHCENT3	2652.25	91.63	172.65	29.57	63.05	37.85	3047	0.870446	gaba	487144598	LHCENT3	651	48	0	46	0	0	0	37	0	0	165	30	0	0	0	31	81	0	18	0	0	63	0	0	0	0	0	0	0	27	0	0	0	0	0	10		19
LHCENT9	2364.65	60.32	140.92	33.01	27.66	27.46	2654	0.890969	gaba	330268940	LHCENT9	33	96	0	0	0	48	0	0	0	11	0	0	38	0	0	0	25	0	145	16	0	0	0	174	25	0	0	0	0	0	0	0	0	0	0	0		10
SMP593	4150.49	96.2674	345.787	14.8801	65.9503	42.6255	4716	0.880087	gaba	518925962, 549282467	SMP593	0	0	0	0	0	0	0	0	0	0	0	0	0	0	0	0	0	0	0	0	0	0	0	0	0	0	0	0	0	0	0	0	0	0	0	0		0
oviIN	9867.09	569.67	1250.59	56.33	477.28	1151.04	13372	0.737892	gaba	423101189, 485934965	oviIN	0	0	0	10	0	0	0	0	0	0	0	0	0	0	0	0	0	0	0	0	0	0	0	0	0	0	0	0	0	0	0	38	0	0	0	0		0
SMP050	1223.78	25.2691	124.586	10.3904	19.734	32.2409	1436	0.852214	gaba	549701100, 5813056054	SMP050	0	0	0	0	0	0	0	0	0	0	0	0	0	0	0	0	0	0	0	0	0	0	0	0	0	0	0	0	0	0	0	0	0	0	0	0		0
CRE055	1192.23	24.55	111.65	3.25	18.94	21.37	1372	0.868979	gaba	5813011840, 5813094619, 673362451, 796836697, 797187575, 798908816, 800273538, 829593966	CRE055	0	0	0	15	33	0	0	660	0	0	261	542	0	0	0	0	0	0	0	0	0	0	138	0	0	0	0	0	0	0	0	0	0	0	0	0		0
CRE051	627.41	11.56	84.4	1.13	7.42	12.1	744	0.84327	gaba	5812982924, 581678043, 673085197, 706840303	CRE051	49	0	0	0	13	0	0	16	0	0	0	29	0	0	0	0	0	0	0	0	0	0	66	0	0	0	0	0	0	0	0	0	0	0	0	0		0
SMP077	780.09	9.25	82.2	2.43	10.44	19.59	904	0.862931	gaba	486194398, 5813019833	SMP077	0	0	0	0	0	0	0	0	0	0	0	0	0	0	0	0	0	0	0	0	0	0	0	0	0	0	0	0	0	0	0	0	0	0	0	27		0
CRE054	889.73	14.84	82.65	2.47	13.69	29.62	1033	0.861307	gaba	5813033196, 5813082459, 829598814, 830634936, 862671913, 922354084	CRE054	0	0	0	88	68	0	0	187	0	0	295	129	0	0	0	0	0	0	0	0	0	0	12	0	0	0	0	0	0	0	0	39	0	0	0	0		0
LHCENT8	4017.62	86.54	196.97	33.63	36.69	30.56	4402	0.912679	gaba	360284300, 511271574	LHCENT8	0	0	0	0	0	0	0	0	0	0	13	0	0	0	0	50	98	21	0	0	0	0	10	0	0	0	0	0	0	0	0	0	0	0	0	0		173
CRE052	188.22	2.87	23.93	0.15	1.94	4.89	222	0.847838	gaba	612703762, 643739027, 674100160, 736173896	CRE052	0	0	0	0	35	0	0	93	0	0	24	91	0	0	0	0	0	0	0	0	0	0	58	0	0	0	0	0	0	0	0	0	0	0	0	0		0
SMP001	492.423	157.461	321.899	53.7876	77.0276	39.4021	1142	0.431193	gaba	5813056887	SMP001	0	0	0	0	0	0	0	0	0	0	0	0	0	0	0	0	0	0	0	0	0	0	0	0	0	0	0	0	0	0	0	0	0	0	0	0		0
LHCENT6	1836.92	51.7018	104.648	32.0022	24.354	23.3743	2073	0.886116	gaba	5813068669	LHCENT6	0	12	0	0	0	71	0	0	0	0	0	0	0	0	0	0	0	0	96	27	0	0	0	216	0	0	0	0	0	0	0	0	0	0	0	0		23
mALD1	2773.52	55.21	142.03	8.62	22.56	19.06	3021	0.91808	gaba	1543535599, 544038123	mALD1	0	0	0	0	0	0	0	0	0	0	0	0	0	0	0	0	0	0	0	0	0	54	0	0	0	0	0	19	0	0	0	0	0	0	0	12		0
WEDPN4	636.745	8.6656	33.202	3.109	2.2605	5.0175	689	0.924159	gaba	5813032740	WEDPN4	0	0	0	0	0	0	0	59	0	0	0	0	0	0	0	41	21	0	0	0	0	0	10	0	0	0	0	0	12	0	0	0	0	0	0	0		0
LHCENT1	2061.8	123.96	154.09	101.26	57.64	72.25	2571	0.801945	gaba	328861282	LHCENT1	0	0	0	0	0	0	0	0	0	10	0	0	0	0	0	0	0	0	207	0	0	0	0	75	59	0	0	0	0	0	0	0	0	0	0	0		5
SMP078	1631.19	48.3202	231.334	8.5384	63.9967	91.6181	2075	0.786117	gaba	298957166, 5813019681	SMP078	0	0	0	0	0	0	0	40	0	0	0	0	0	0	0	0	0	0	0	0	0	0	0	0	0	0	0	0	0	0	0	0	0	0	0	11		18
LAL100	1624.32	67.61	110.85	15.71	83.59	84.93	1987	0.817469	gaba	5813105778, 984536209	LAL100	0	0	0	0	0	0	0	0	0	26	29	0	0	0	0	0	0	0	0	0	0	66	0	0	0	0	0	0	0	0	0	0	0	0	0	0		0
CRE057	347.6	7.23	33.05	0.36	4	4.76	397	0.875567	gaba	736839651, 768884949	CRE057	0	0	0	0	56	0	0	132	0	0	38	91	0	0	0	0	0	0	0	0	0	0	26	0	0	0	0	0	0	0	0	0	0	0	0	0		0
ALIN1	325.135	190.169	121.977	9.1161	26.324	16.279	689	0.471894	gaba	693927941, 704699661	ALIN1	0	0	0	0	0	0	0	102	0	0	21	0	0	0	0	0	0	0	0	0	0	0	92	0	0	0	0	0	0	0	0	0	0	0	0	0		98
SMP076	1541.33	39.62	122.28	11.88	51.61	45.29	1812	0.850619	gaba	296139882, 5813104761	SMP076	0	0	0	61	0	0	0	26	0	97	0	0	0	0	0	0	0	0	0	0	0	70	53	0	41	0	0	0	0	85	0	0	0	0	0	0		82
SMP049	1638.65	49.18	139.01	23.75	66.37	63.06	1980	0.827593	gaba	297251714, 361108721	SMP049	0	0	0	26	0	0	0	0	0	43	0	0	0	0	0	0	0	0	0	0	0	18	16	0	29	0	0	0	0	38	0	0	0	0	0	0		78
mALB1	1797.97	29.19	46.29	5.27	14.97	9.32	1903	0.944803	gaba	611323175	mALB1	0	0	0	0	0	0	0	0	0	0	0	0	0	0	0	107	58	0	0	0	0	0	0	0	0	0	0	0	0	0	0	0	0	0	0	0		3
SMP164	682.83	19.44	68.5	3.35	10.04	19.85	804	0.84928	gaba	611693656, 673518025	SMP164	0	0	0	0	0	0	0	0	0	0	0	0	0	0	0	0	0	0	0	0	0	0	0	0	0	0	0	0	0	0	0	0	0	18	0	168		0
mALD4	994.107	108.428	74.974	8.1017	48.4133	16.9756	1251	0.79465	gaba	1292367728	mALD4	0	0	0	0	0	0	0	0	0	0	0	0	0	0	0	0	0	0	0	0	0	0	0	0	0	0	0	0	0	0	0	0	0	20	0	132		0
CRE056	523.243	9.5524	36.9067	2.6731	15.5077	26.1168	614	0.852188	gaba	952723817, 952724101, 953410147, 984449267	CRE056	0	0	0	0	0	0	0	33	0	0	0	0	0	0	0	0	0	0	0	0	0	0	0	0	0	0	0	0	0	0	0	0	0	0	0	0		0
SMP146	1623.31	32.66	236.05	6	20.22	44.76	1963	0.826954	gaba	268731005, 299289811	SMP146	0	0	0	0	0	0	0	0	0	0	0	0	0	0	0	0	0	0	0	0	0	0	0	0	0	0	0	0	0	0	0	0	0	0	0	0		0
SIP028	311.877	5.1614	40.431	1.5298	2.9147	14.0859	376	0.829461	gaba	425126008, 638930511, 670651584	SIP028	0	0	0	0	0	0	0	0	0	0	0	0	0	0	0	0	0	0	0	0	0	0	0	0	0	0	0	0	0	0	0	0	0	0	0	0		0
LHCENT5	824.495	16.8621	134.554	2.4891	4.9962	8.6034	992	0.831144	gaba	579912201	LHCENT5	162	26	16	34	12	0	0	102	0	0	0	0	0	0	0	0	0	0	0	0	0	0	0	0	0	0	0	0	0	0	0	0	0	0	0	0		0
CRE013	1766.34	32.991	118.777	9.3994	13.7466	25.7504	1967	0.897985	gaba	548570973, 550068041	CRE013	0	0	0	0	0	0	0	0	0	0	0	0	0	0	0	0	0	0	0	0	0	0	0	0	0	0	0	0	0	0	15	0	0	0	0	15		0
M_vPNml50	1445.69	37.5323	48.2325	5.5414	9.7122	12.2868	1559	0.927322	gaba	610274029, 610274046	M_vPNml50	0	0	0	0	0	0	0	0	0	0	0	67	0	0	0	0	0	0	0	0	0	0	0	0	0	0	0	0	33	0	0	0	0	0	0	0		3
CRE043_c	699.155	9.5337	60.0156	1.6803	8.6524	17.9625	797	0.877234	gaba	5813027737, 5813089803, 5813133463, 797981213	CRE043_c	0	0	0	0	0	0	0	0	0	0	0	0	0	0	0	0	0	0	0	0	0	0	0	0	0	14	0	0	0	0	0	0	0	0	14	12		0
SIP027	437.461	13.1593	60.6585	3.724	8.9067	15.0906	539	0.811616	gaba	515813661, 548878145, 5901227537, 607898830	SIP027	0	0	0	0	0	0	0	0	0	0	0	0	0	0	0	0	0	0	0	0	0	0	0	0	0	0	0	0	0	0	0	0	0	0	0	0		0
LHCENT10	2587.77	40.7368	116.77	17.4	16.4462	37.875	2817	0.918627	gaba	329225149, 329897255	LHCENT10	14	0	0	0	0	0	0	0	0	0	0	0	0	0	0	0	0	0	0	0	0	0	0	0	0	0	0	0	0	0	0	0	0	0	0	0		0
CRE012	1501.89	158.794	153.292	62.0594	118.294	84.6737	2079	0.722408	gaba	5813058319, 861073717	CRE012	0	0	0	0	0	0	0	0	0	0	0	0	0	0	0	0	0	0	0	0	0	0	0	0	0	0	0	41	0	0	30	0	0	0	0	0		0
LHCENT2	2372.79	113.743	139.23	63.307	36.6819	32.2448	2758	0.860331	gaba	327499164	LHCENT2	0	0	0	0	0	0	0	0	0	13	0	0	0	0	0	0	0	0	0	14	0	0	0	23	110	0	0	0	0	0	0	0	0	0	0	0		146
SMP079	801.623	54.8952	129.33	14.9058	48.5291	58.7166	1108	0.723487	gaba	454896445, 5813026661	SMP079	0	0	0	0	0	0	0	0	0	0	0	0	0	0	0	0	0	0	0	0	0	0	0	0	0	0	0	0	0	0	0	0	0	0	0	0		0
CRE058	832.75	26.8844	73.708	1.6639	5.1404	13.8539	954	0.872903	gaba	640630581, 702704906, 766493391, 767174553, 798892246, 829939688	CRE058	0	0	0	71	0	0	0	0	0	0	141	10	0	0	0	0	0	0	0	0	0	0	0	0	0	0	0	0	0	0	0	0	0	0	0	0		0
CRE053	319.76	4.85	27.43	0.3	3.08	5.57	361	0.885786	gaba	672006007, 700321894	CRE053	25	0	0	0	0	0	0	0	0	0	52	0	0	0	0	0	0	0	0	0	0	0	0	0	0	0	0	0	0	0	0	0	0	0	0	0		0
CRE021	675.26	25.62	56.42	7.64	11.24	17.82	794	0.850453	gaba	5813082722, 767904550	CRE021	0	0	0	0	0	0	0	28	0	0	0	0	0	0	0	0	0	0	0	0	0	0	0	0	0	0	0	0	0	0	48	0	0	0	0	0		0
LHPV9b1	353.326	37.1663	267.813	5.4366	13.341	17.9177	695	0.508382	gaba	602476655	LHPV9b1	0	0	0	0	0	0	0	0	0	0	17	0	0	0	0	0	0	36	0	0	0	0	0	0	0	0	0	0	0	0	42	0	0	14	0	0		0
CRE041	1108.88	66.1029	135.193	14.2308	37.7523	46.8406	1409	0.786998	gaba	1081957306, 673863199	CRE041	19	0	0	0	0	0	0	0	0	0	0	0	0	0	0	0	0	0	0	0	0	0	0	0	0	0	0	27	0	0	0	0	0	0	0	220		0
SMP163	1538.26	102.02	130.568	7.2105	40.0213	29.9196	1848	0.832392	gaba	1112099400, 733458828	SMP163	10	0	0	0	0	0	0	116	0	0	0	0	0	0	0	0	0	0	0	0	0	0	0	0	0	0	0	0	0	0	0	0	0	0	0	119		0
CRE030_b	198.42	42.8646	196.006	5.4343	15.8059	22.4684	481	0.412516	gaba	644118254, 675187643	CRE030_b	0	0	0	0	0	0	0	36	0	0	0	0	0	0	0	0	0	0	0	0	0	0	0	0	0	0	0	0	0	0	0	0	0	0	0	0		0
LAL008	521.09	178.566	356.927	9.173	14.5849	17.6593	1098	0.474581	gaba	1170352367, 1605181883	LAL008	0	0	0	0	0	0	0	0	0	0	0	0	0	0	0	0	0	0	0	0	0	0	0	0	0	0	0	0	0	0	0	0	0	0	0	257		0
CRE040	2891.46	69.3532	493.965	6.5081	34.3824	38.3363	3534	0.818182	gaba	549722579, 668967527	CRE040	0	0	0	0	0	0	0	0	0	0	0	0	0	0	0	0	0	0	0	0	0	0	0	0	0	0	0	0	0	0	68	0	59	0	0	21		0
CRE044	861.444	68.8791	124.247	37.6237	427.197	82.6089	1602	0.53773	gaba	1544554625, 5813021138, 5813070070, 582027783, 582709537, 613126471, 645897107, 707509964, 832357089	CRE044	0	0	0	0	23	0	0	0	0	0	0	0	0	0	0	0	0	0	0	0	0	0	0	0	0	0	0	0	0	0	0	0	0	0	0	16		0
LAL120	1282.93	301.508	420.654	26.1163	37.7088	39.0802	2108	0.608601	gaba	1479626494, 1542033633, 5812979148	LAL120	0	0	0	0	0	0	0	0	0	0	0	0	0	0	0	0	0	0	0	0	0	0	0	0	0	0	18	153	0	0	0	0	0	0	0	0		0
LAL042	369.393	166.753	290.073	11.282	19.405	18.0946	875	0.422163	gaba	1543138040, 958197533	LAL042	0	0	0	0	0	0	0	0	0	0	0	0	0	0	0	0	0	0	0	0	0	0	0	0	0	0	0	0	0	0	0	0	0	0	0	227		0
CRE100	462.179	103.889	131.629	14.421	42.6313	62.2509	817	0.565703	gaba	1013416147, 891771553	CRE100	0	0	0	0	0	0	0	230	0	10	0	0	0	0	0	0	0	0	0	0	0	164	0	0	0	0	0	14	0	45	14	0	0	0	0	0		0
IB005	501.25	59.45	60.65	16.3	31.9	32.45	702	0.714031	gaba	882144985, 913262104	IB005	0	0	0	0	0	0	0	0	0	0	0	0	0	0	0	0	0	0	0	0	0	0	0	0	0	0	0	0	0	0	0	0	0	0	0	184		0
LAL040	633.249	126.249	67.037	26.7594	26.6569	53.049	933	0.678724	gaba	1138579549	LAL040	0	0	0	0	0	0	0	0	0	0	0	0	0	0	0	0	0	0	0	0	0	0	0	0	0	0	0	0	0	0	0	0	0	0	0	88		0
LAL045	690.504	172.498	43.8415	39.9005	38.9781	45.2777	1031	0.669742	gaba	1325133618	LAL045	0	0	0	0	0	0	0	0	0	0	0	0	0	0	0	0	0	0	0	0	0	0	0	0	0	0	0	0	0	0	0	0	0	0	0	110		0
LAL051	647.77	186.504	364.484	3.4286	6.4996	8.3139	1217	0.532268	gaba	1448929233	LAL051	0	0	0	0	0	0	0	0	0	0	0	0	0	0	0	0	0	0	0	0	0	0	0	0	0	0	422	19	0	0	0	167	0	0	0	0		0
LAL101	604.197	86.7819	58.2555	13.976	65.5075	37.2818	866	0.697687	gaba	5812983825	LAL101	0	0	0	0	0	0	0	0	0	0	0	0	0	0	0	0	0	0	0	0	0	0	0	0	0	0	0	0	0	0	0	0	0	0	0	100		0
LAL001	288.391	206.28	249.078	46.7787	87.2849	64.1877	942	0.306148	gaba	5813047453	LAL001	0	0	0	0	0	0	0	0	0	0	0	0	0	0	0	0	0	0	0	0	0	0	0	0	0	0	0	0	0	0	0	0	0	0	0	105		0
LAL072	402.433	55.4965	199.538	7.4288	8.6218	7.4821	681	0.590944	gaba	5813049870	LAL072	0	0	0	0	0	0	0	0	0	0	0	0	0	0	0	0	0	0	0	0	0	0	0	0	0	0	93	0	0	0	0	0	0	0	0	0		0
WEDPN3	632.922	10.4026	24.2565	1.7232	3.1075	5.5877	678	0.933514	gaba	1006854683, 5813013913, 5813020138	WEDPN3	0	0	0	0	0	0	0	0	0	0	0	0	0	0	0	32	13	0	0	0	0	0	0	0	0	0	0	0	48	0	0	0	0	0	0	0		0
FR1	860.453	273.717	87.7455	25.3252	269.055	618.705	2135	0.403022	gaba	1137279454, 1168660275, 1195559184, 633951900, 665332092, 696354016, 788427061, 819440815, 879192161	FR1	0	0	0	0	0	0	0	0	0	0	0	0	0	0	0	0	0	0	0	0	0	0	0	0	0	0	0	0	0	0	0	0	0	0	0	0		0
FB4H	765.591	115.691	552.269	8.8027	120.959	131.688	1695	0.451676	gaba	5813053846, 953414780	FB4H	0	0	0	0	0	0	0	0	0	0	0	0	0	0	0	0	0	0	0	0	0	22	0	0	0	14	0	0	0	10	0	0	0	0	65	0		0
CRE043_a	449.545	7.1048	60.2229	0.2469	3.0083	4.8715	525	0.856277	gaba	5901218930, 829697614, 892385258	CRE043_a	0	0	0	10	52	0	0	0	0	0	0	0	0	0	0	0	0	0	0	0	0	0	0	0	0	0	0	0	0	0	0	0	0	0	0	0		0
LHPV2a1_a	505.194	14.3826	24.7049	4.5056	5.7326	7.4804	562	0.898922	gaba	724820565, 822009511	LHPV2a1_a	0	0	0	0	0	0	0	0	0	0	0	0	0	0	0	0	0	47	0	0	0	0	0	0	0	0	0	0	0	0	0	0	0	0	0	0		0
WEDPN2B	643.436	17.5959	25.0555	10.0506	20.7567	9.1057	726	0.886275	gaba	853726809, 916828438	WEDPN2B	0	0	0	0	0	0	0	0	0	0	0	0	0	0	0	56	0	0	0	0	0	0	0	0	0	0	0	0	25	0	0	0	0	0	0	0		0
SMP114	174.03	88.08	1159.59	21.52	32.74	69.03	1545	0.750549	glutamate	517872280, 550081666	SMP114	0	0	0	0	12	0	0	0	0	0	156	0	0	0	0	0	0	0	0	0	0	0	0	0	0	0	0	0	0	34	87	0	0	0	0	0		0
SMP115	147.95	116.25	1102.11	32.19	31.05	87.46	1517	0.726501	glutamate	550275952, 550422384	SMP115	0	0	0	0	0	0	0	0	0	0	189	88	0	0	0	0	0	0	0	0	0	0	0	0	0	0	0	0	0	0	0	0	0	0	0	0		0
SMP127	115.04	64.01	881.21	2.67	8.16	32.91	1104	0.798197	glutamate	393404592, 520380132	SMP127	0	0	0	0	0	0	0	39	0	0	121	101	0	0	0	0	0	0	0	0	0	13	0	0	0	0	0	0	0	41	54	0	0	0	0	0		0
SMP120	54.69	17.3	280.59	0.61	6.08	17.73	377	0.744271	glutamate	392411222, 452162916, 455815977, 484554412	SMP120	0	0	0	0	0	0	0	0	0	0	27	0	0	0	0	0	0	0	0	0	0	0	0	0	0	0	0	0	0	60	0	0	0	0	0	0		0
SMP128	89.4173	44.3538	621.237	9.7899	9.231	27.9705	802	0.77461	glutamate	488322846, 5812980079	SMP128	0	0	0	0	0	0	0	0	0	0	50	0	0	0	0	0	0	0	0	0	0	0	0	0	0	0	0	0	0	0	0	0	0	0	0	0		0
CRE048	281.017	102.463	630.206	20.9484	21.4252	41.9395	1098	0.573958	glutamate	5813019850	CRE048	12	0	0	0	91	0	0	46	0	0	274	57	0	0	0	0	0	0	0	0	0	0	0	0	0	0	0	0	0	0	121	0	0	0	0	0		0
SLP176	277.17	87.6761	453.404	62.7256	28.3075	40.717	950	0.477268	glutamate	329566187, 389575937, 390969969, 419588136, 420952125, 5813010255	SLP176	0	0	0	0	0	0	0	0	0	0	0	0	11	0	0	0	0	0	0	0	0	0	0	0	11	0	0	0	0	0	0	0	0	0	0	0		0
SMP119	22.2966	17.5516	229.15	0.8971	3.2926	10.8125	284	0.806865	glutamate	357945155	SMP119	0	0	0	0	0	0	0	0	0	0	25	0	0	0	0	0	0	0	0	0	0	0	0	0	0	0	0	0	0	0	0	0	0	0	0	0		0
SMP170	149	108.61	225.64	51.4616	41.9987	58.2897	635	0.355339	glutamate	299626157, 361700223	SMP170	0	0	0	0	0	0	0	0	0	0	0	0	15	0	0	0	0	0	0	0	0	0	0	0	0	0	0	0	0	0	0	0	0	0	0	0		0
SMP126	64.7066	23.8575	510.382	4.9363	3.7314	12.3864	620	0.823196	glutamate	296885362, 518369709	SMP126	0	0	0	0	0	0	0	0	0	0	26	0	0	0	0	0	0	0	0	0	0	0	0	0	0	0	0	0	0	0	0	0	0	0	0	0		0
LHPD2c7	105.87	29.66	269.87	4.4	14.25	20.96	445	0.606436	glutamate	576502536, 579234980	LHPD2c7	22	0	0	0	0	0	0	0	0	0	0	0	0	0	0	0	0	0	0	0	0	0	0	0	0	0	0	0	0	0	0	0	0	0	0	0		0
SLP135	64.7935	44.775	276.926	16.0585	12.5009	30.9454	446	0.620912	glutamate	358890923, 390280026, 485499217	SLP135	0	0	0	0	0	0	0	0	0	0	0	0	0	0	0	0	0	0	0	0	0	0	0	0	0	0	0	0	0	0	0	0	0	0	0	0		0
SMP198	151.425	112.066	650.895	18.4075	40.7628	91.4436	1065	0.611169	glutamate	5813021602	SMP198	0	0	0	0	0	0	0	0	0	0	0	0	0	47	0	0	0	0	0	0	0	0	0	0	0	0	0	0	0	28	0	0	0	0	0	0		0
SMP122	211.57	25.1959	390.727	7.1032	23.7777	33.626	692	0.564635	glutamate	5813056057, 611037750	SMP122	0	0	0	0	0	0	0	0	0	0	0	0	0	0	0	0	0	0	0	0	0	0	0	0	0	0	0	0	0	0	0	0	0	0	0	0		0
SMP123	285.174	88.5659	682.004	16.3478	42.1809	67.7271	1182	0.576992	glutamate	488572496, 546287086, 547240545, 547310321	SMP123	0	0	0	0	0	0	0	0	0	0	0	0	0	0	0	0	0	0	0	0	0	0	0	0	0	0	0	0	0	0	0	0	0	0	0	0		0
SMP125	87.4713	42.4436	590.571	16.4877	11.0698	27.9569	776	0.761045	glutamate	360764170, 5901195498	SMP125	0	0	0	0	0	0	0	0	0	0	35	0	0	0	0	0	0	0	0	0	0	0	0	0	0	0	0	0	0	0	0	0	0	0	0	0		1
SMP210	90.3572	38.0431	310.692	12.8146	18.704	29.389	500	0.621384	glutamate	510278853, 540972196, 675119034	SMP210	0	0	0	0	0	0	0	0	0	0	0	0	0	0	0	0	0	0	0	0	0	0	0	0	0	0	0	0	0	0	0	0	0	0	0	0		0
SMP012	188.226	68.7924	605.294	17.949	31.4363	40.3029	952	0.635813	glutamate	326817334, 486880919	SMP012	0	0	0	11	0	0	0	0	0	0	0	34	0	0	0	0	0	0	0	0	0	0	0	0	0	0	0	0	0	0	0	0	0	0	0	0		0
SLP018	245.102	104.814	373.735	72.6854	49.0619	39.6013	885	0.4223	glutamate	422669150, 451663172, 452677002, 453355233, 947820593	SLP018	0	0	0	0	0	0	0	0	0	0	0	0	0	0	0	0	0	0	0	0	0	0	0	0	0	0	0	0	0	0	0	0	0	0	0	0		0
SIP016	63.78	22.67	151.72	4.68	2.36	8.8	254	0.597299	glutamate	518183562, 578893446, 579596940, 612648076	SIP016	0	0	0	0	0	0	0	0	0	0	53	114	62	0	0	50	10	0	0	0	0	0	0	0	0	0	0	0	0	0	0	0	0	0	0	0		0
SMP443	83.5675	30.7658	323.064	5.3843	8.4896	10.7289	462	0.699273	glutamate	517514588	SMP443	82	208	0	0	0	0	0	0	0	100	12	0	0	0	0	0	0	0	16	0	0	0	0	0	0	0	0	0	0	0	0	13	0	0	0	0		0
SMP081	389.11	162.55	1267.38	9.47	38.15	74.36	1941	0.652945	glutamate	330678844, 361040812, 361722354, 5813057162	SMP081	51	0	0	0	0	0	0	0	0	0	0	0	0	0	0	0	0	0	0	0	0	0	0	0	0	0	0	0	0	0	0	0	0	0	0	0		0
SIP010	91.9895	32.6086	375.565	14.747	9.1317	20.9584	545	0.68911	glutamate	550280614, 609587511, 609591880, 609591989	SIP010	10	0	0	0	0	0	0	0	0	0	0	0	0	12	0	0	0	0	0	0	0	0	0	0	0	0	0	0	0	0	0	0	0	0	0	0		0
SIP011	121.176	36.6811	304.969	8.5915	8.6187	21.9642	502	0.607507	glutamate	609587594, 609591758, 609591823, 609591891	SIP011	0	0	0	0	0	0	0	0	55	0	0	0	0	0	13	0	0	0	0	0	0	0	0	0	0	0	0	0	0	0	0	0	0	0	0	0		0
SMP084	456.407	111.908	1320.09	18.6084	33.6565	70.3291	2011	0.656435	glutamate	297917363, 297925608, 331774819, 392130578	SMP084	0	0	0	0	0	0	0	0	0	0	0	0	0	0	0	0	0	0	0	0	0	0	0	0	0	0	0	0	0	0	0	0	0	0	0	0		0
CRE075	294.68	37.3	509.97	11.54	8.14	16.37	878	0.580831	glutamate	448342846	CRE075	0	0	0	0	0	0	0	0	0	0	0	0	0	0	0	0	0	0	0	0	0	0	0	0	0	0	0	0	0	0	340	0	0	0	0	0		0
SIP026	114.004	65.9916	198.186	36.6222	16.0784	24.1181	455	0.435574	glutamate	5813083733	SIP026	0	0	0	0	0	0	0	0	0	31	0	0	0	0	0	0	0	0	0	0	0	33	17	0	0	0	0	0	0	32	0	0	0	0	0	0		0
SIP015	222.368	90.8966	457.302	22.6141	14.6392	26.1794	834	0.548324	glutamate	294450004, 486812022, 548203966, 549219101	SIP015	0	0	0	0	0	0	0	0	0	0	128	169	45	0	0	0	0	0	0	0	0	0	0	0	0	0	0	0	0	0	0	11	0	0	0	0		10
SLP191	374.065	154.954	426.836	51.6469	37.9712	63.5265	1109	0.384884	glutamate	328193076, 420973599, 421313563, 5813008938, 5813010210, 5813026622	SLP191	0	0	0	0	0	0	0	0	0	0	0	0	0	0	0	0	0	0	0	0	0	0	0	15	0	0	0	0	0	0	0	0	0	0	0	0		0
SMP419	52.8611	13.9005	191.755	2.8364	2.4074	5.2394	269	0.712845	glutamate	640596169	SMP419	0	0	0	0	0	0	0	0	0	0	0	0	0	0	0	0	0	0	0	0	0	0	0	0	0	0	0	0	0	0	0	0	0	0	0	0		0
SMP124	134.34	29.77	194.78	2.85	15.92	25.34	403	0.483325	glutamate	484911881, 486876782, 516214576, 516965856	SMP124	0	0	0	0	0	0	0	0	0	0	0	0	0	0	0	0	0	0	0	0	0	0	0	0	0	0	0	0	0	10	0	0	0	0	0	0		0
CRE029_a	366.696	116.506	609.384	13.0123	55.5445	103.857	1265	0.481726	glutamate	5813022199, 612414168, 643794320, 674807824	CRE029_a	0	0	0	0	0	0	0	0	0	0	0	0	0	0	0	0	0	0	0	0	0	0	0	0	0	0	0	0	0	0	0	0	0	0	0	0		0
SMP376	527.22	110.37	1074.16	15.15	17.76	35.34	1780	0.603461	glutamate	5813027592, 604289581	SMP376	0	0	0	0	0	0	0	0	0	0	0	0	0	0	0	0	0	0	0	0	0	0	0	0	0	0	0	0	0	74	0	0	0	0	0	0		0
SMP212	47.14	5.74	74.7	3.27	4.6	6.55	142	0.526056	glutamate	5813058310, 702692200, 893338749	SMP212	0	0	0	0	11	0	0	10	0	32	0	0	0	0	0	0	0	0	0	0	0	0	0	0	0	0	0	0	0	0	0	0	0	0	0	0		0
SMP211	107.19	41.716	406.755	5.3379	7.709	20.292	589	0.690585	glutamate	355086967, 731689147, 892997744	SMP211	0	0	0	0	0	0	0	36	0	0	23	0	0	0	0	0	0	0	0	0	0	0	0	0	0	0	0	0	0	0	0	0	0	0	0	0		0
CRE074	587.12	84.07	618.7	14.99	30	26.12	1361	0.454592	glutamate	508689623	CRE074	0	0	0	0	0	0	0	0	0	0	0	0	0	0	0	0	0	0	0	0	0	0	0	0	0	0	0	0	0	0	22	0	0	0	0	0		1
SLP280	146.116	85.5605	192.873	28.5078	16.3671	34.5753	504	0.382685	glutamate	5813047713	SLP280	0	0	0	0	0	0	0	0	0	0	0	0	0	0	0	0	0	0	0	32	0	0	0	25	0	0	0	0	0	0	0	0	0	0	0	0		0
CRE102	243.179	42.8789	684.615	9.9621	9.5941	19.7703	1010	0.677837	glutamate	5813021046, 5813061258	CRE102	0	0	0	0	0	0	0	0	124	0	83	28	0	0	0	0	0	0	0	0	0	0	0	0	0	0	0	0	0	0	0	67	0	0	0	0		0
SMP089	927.422	199.908	1741.43	13.8944	29.4067	51.94	2964	0.587527	glutamate	453536432, 454477603, 484911954, 610351307	SMP089	57	0	0	0	0	0	0	0	0	0	25	12	0	0	0	0	0	0	0	0	0	0	0	0	0	0	0	0	0	0	0	0	0	0	0	0		0
CRE050	487.96	207.02	761.6	16.49	20.83	64.09	1558	0.488835	glutamate	425104178, 642702809	CRE050	0	0	0	0	0	0	0	132	0	402	0	14	0	0	0	0	0	0	0	0	0	72	148	0	119	0	0	0	0	84	19	0	0	0	0	0		0
SMP116	254.69	97.77	895.95	20.31	35.05	106.24	1410	0.635421	glutamate	5813134052, 582101022	SMP116	0	0	0	0	0	0	0	0	0	0	54	0	0	0	0	0	0	0	0	0	0	0	0	0	0	0	0	0	0	14	0	59	0	0	0	0		0
SMP087	224.632	157.386	978.95	12.2018	26.1808	73.6501	1473	0.664596	glutamate	298250090, 298586553, 330661786, 423852469	SMP087	0	0	0	0	0	0	0	0	0	0	0	0	0	0	0	0	0	0	0	0	0	0	0	0	0	0	0	0	0	0	0	0	0	0	0	0		0
SMP208	137.055	28.4191	137.276	4.3537	34.7072	49.1885	391	0.351091	glutamate	738531654, 767878191, 800256481	SMP208	0	0	0	0	0	0	0	11	0	0	48	36	0	0	0	0	0	0	0	0	0	0	0	0	0	0	0	0	0	0	0	0	0	0	0	0		0
SMP075	371.29	36.91	462.21	2.92	19.11	33.54	926	0.499158	glutamate	581336531, 613044611	SMP075	0	0	0	0	0	0	0	0	0	0	32	34	0	0	0	0	0	0	0	0	0	87	0	0	0	0	0	0	0	0	60	0	0	0	0	13		0
SMP165	397.64	40.66	404.55	6.39	28.69	25.08	903	0.448002	glutamate	456523994, 923415956	SMP165	66	0	0	0	0	0	0	0	0	29	0	0	0	0	0	0	0	0	0	0	0	0	0	0	0	0	15	0	0	33	0	0	0	0	0	0		0
SMP213	65.9173	13.5736	195.99	2.8473	10.1354	16.5361	305	0.642591	glutamate	644417091, 705816818, 801279493	SMP213	87	0	0	0	0	0	0	0	0	0	0	0	0	0	0	0	0	0	0	0	0	0	0	0	0	0	0	0	0	0	0	0	0	0	0	0		0
SMP082	232.59	121.8	682.95	6.49	14.36	27.81	1086	0.628867	glutamate	298254517, 328265389, 329310230, 5813026589	SMP082	0	0	0	0	0	0	0	0	0	0	0	0	0	0	0	0	0	0	0	0	0	0	0	0	0	0	0	0	0	0	0	0	0	0	0	0		0
SMP207	112.23	21.6908	157.023	4.1001	28.6548	35.3017	359	0.43739	glutamate	671005363, 673426911	SMP207	59	0	0	0	0	0	0	30	0	0	12	0	0	0	0	0	0	0	0	0	0	0	0	0	0	0	0	0	0	0	0	0	0	0	0	0		0
SMP058	211.603	116.062	635.775	31.9733	36.6377	110.949	1143	0.556234	glutamate	582381047, 613179816	SMP058	0	0	0	13	0	0	0	0	0	0	71	15	0	0	0	0	0	0	0	0	0	0	0	0	0	0	0	0	0	0	0	0	0	0	0	0		0
SMP024	156.551	41.3036	296.775	12.7574	18.9934	36.6194	563	0.527132	glutamate	579260627, 5813019920, 5813082780, 609247082, 735470305	SMP024	0	0	0	0	0	0	0	0	0	0	0	0	0	0	0	0	0	0	0	0	0	0	0	0	0	0	0	0	0	0	0	0	0	0	0	0		0
CRE032	134.046	31.3537	233.27	5.3666	19.8117	32.1516	456	0.511558	glutamate	5812982125, 613083375	CRE032	0	0	0	0	10	0	0	0	0	0	10	0	0	0	0	0	0	0	0	0	0	0	0	0	0	0	0	0	0	0	0	0	0	0	0	0		0
SMP085	428.671	272.348	1577.83	24.2688	43.9857	145.899	2493	0.632903	glutamate	393776005, 425148091, 484829654, 485171425	SMP085	0	0	0	0	0	0	0	0	0	0	0	0	0	0	0	0	0	0	0	0	0	0	0	0	0	0	0	0	0	0	0	0	0	0	0	0		0
SMP011	110.5	37.64	323.34	11.51	17.43	25.57	526	0.614727	glutamate	484126552, 510987433	SMP011	10	0	12	0	19	0	0	0	0	0	0	0	0	29	0	0	0	0	0	0	0	0	0	0	0	0	0	0	0	0	0	0	0	0	0	0		0
FB4D	252.476	484.493	679.628	23.5311	231.62	371.252	2043	0.332662	glutamate	1076293806, 1100801188, 5813071255, 5813088712, 858937324, 859618655	FB4D	0	0	0	0	0	0	0	0	0	0	0	0	0	0	0	0	0	0	0	0	0	0	0	0	0	0	0	0	0	0	0	0	0	0	0	0		0
FB4P_b	212.58	299.48	834.79	111.52	642.71	778.92	2880	0.289858	glutamate	1163199311, 5812983846, 5813075748, 5813079193, 862036858, 894168625, 925548084	FB4P_b	0	0	0	0	0	0	0	0	0	0	0	0	0	0	0	0	0	0	0	0	0	187	0	0	0	0	0	0	0	0	0	0	0	0	0	0		0
CRE031	227.905	72.3824	465.412	13.2632	15.8693	38.1687	833	0.558718	glutamate	5813033033, 5813080769, 644148647, 675144948	CRE031	0	0	0	0	0	0	0	24	0	0	0	0	0	0	0	0	0	0	0	0	0	0	0	0	0	0	0	0	0	0	0	0	0	0	0	0		0
LHPD2d1	219.071	31.9834	274.331	19.8742	13.2128	10.5283	569	0.482128	glutamate	392368893	LHPD2d1	0	29	0	0	0	0	0	0	0	0	0	16	0	0	0	0	0	0	0	0	0	0	0	15	0	0	0	0	0	0	0	0	0	0	0	0		0
LHPD2a3	125.126	22.3246	201.495	11.2347	14.4397	19.3801	394	0.511409	glutamate	486850582, 5813099667, 735772860	LHPD2a3	0	0	0	0	0	0	0	0	0	0	0	24	0	0	0	0	0	0	0	67	0	0	0	0	0	0	0	0	0	0	0	0	0	0	0	0		0
CRE027	404.624	110.777	498.796	25.4224	110.722	102.659	1253	0.398081	glutamate	519279166, 519620935, 581060581, 610731053	CRE027	0	0	0	0	0	0	0	0	0	0	0	0	0	0	0	0	0	0	0	0	0	0	0	0	0	0	0	0	0	0	12	0	0	0	10	0		0
SMP027	77.8321	59.218	403.57	3.2536	17.2476	47.8787	609	0.662677	glutamate	390352384	SMP027	0	0	0	0	0	0	0	0	0	0	0	0	0	0	0	0	0	0	0	0	0	0	0	0	0	0	0	0	0	0	0	0	0	0	0	0		0
SMP059	202.364	96.0292	498.164	30.5446	24.4492	69.4488	921	0.540895	glutamate	608754263, 644450686	SMP059	0	0	0	13	0	0	0	0	0	0	52	14	0	0	0	0	0	0	0	0	0	0	0	0	0	0	0	0	0	0	0	0	0	0	0	0		0
FB4C	621.242	168.846	666.306	16.4493	154.773	140.383	1768	0.37687	glutamate	1131836229, 1225290633	FB4C	0	0	0	0	10	0	0	0	0	0	0	0	0	0	0	0	0	0	0	0	0	67	0	0	0	0	0	0	0	0	0	0	0	0	0	0		0
CRE029_b	254.321	67.5281	559.193	4.7268	26.4959	67.7347	980	0.570605	glutamate	612742165, 644152981, 675187558, 861005020	CRE029_b	0	0	0	0	0	0	0	0	0	0	0	0	0	0	0	0	0	0	0	0	0	0	0	0	0	12	0	0	0	0	0	0	0	0	14	0		0
SIP052	69.4083	37.2993	341.73	2.7072	1.9244	4.9304	458	0.746136	glutamate	608628936	SIP052	0	0	0	0	0	0	0	0	0	0	0	39	0	10	0	0	0	0	0	0	0	0	0	0	0	0	0	0	0	0	0	0	0	0	0	0		0
FB4R	373.44	206.59	625.406	43.8459	207.234	233.483	1690	0.370063	glutamate	1131836336, 1131840673, 5813056410, 5813086586	FB4R	0	0	0	0	27	0	0	238	0	0	0	0	0	0	0	0	0	0	0	0	0	245	0	0	0	0	0	0	0	0	0	0	0	0	0	0		0
CRE023	634.977	109.727	963.406	13.0749	25.4724	54.3435	1801	0.534928	glutamate	610312734, 612755343	CRE023	0	0	0	0	0	0	0	0	0	0	0	0	0	0	0	0	0	0	0	0	0	0	0	0	0	0	0	0	0	0	0	0	0	22	0	0		0
LHMB1	350.283	181.434	711.956	24.4789	14.1292	25.7194	1308	0.544309	glutamate	5813020988	LHMB1	15	60	10	0	0	38	0	0	0	0	32	12	0	0	14	0	10	12	0	0	0	0	0	0	0	0	0	0	0	0	0	0	0	0	0	0		1
CRE039	334.98	109.49	724.27	9.3	23.1	52.83	1254	0.577582	glutamate	5813054079, 5813054659, 5813123042, 613083317, 644148539, 644153089, 739572008, 894551935	CRE039	0	0	0	0	0	0	0	0	0	0	0	0	0	0	0	0	0	0	0	0	0	0	0	0	0	0	0	0	0	0	0	0	0	0	11	0		0
SIP042_a	26.89	6.84	41.81	1.21	2.76	1.49	81	0.516173	glutamate	611323310, 612652688, 823015627	SIP042_a	0	0	0	0	0	0	0	0	0	0	12	50	0	0	0	0	0	0	0	0	0	0	0	0	0	0	0	0	0	0	0	0	0	0	0	0		0
SIP038	119.41	70.9885	504.674	29.1902	13.6222	37.1154	775	0.651192	glutamate	509928946, 510269590, 549935124, 580282938	SIP038	0	0	0	0	0	0	0	0	0	0	0	0	0	0	0	0	0	0	0	0	0	0	0	0	0	0	0	0	0	0	0	0	0	0	0	0		0
FB5V	745.303	593.877	1829.88	32.6027	213.215	429.124	3844	0.476035	glutamate	1020280792, 1049674502, 1050024735, 1050266721, 1050935614, 1113371822, 1143129698, 1163190900, 1163570493, 1163898298, 1194562363, 5813062592, 864073833, 926490072, 988909130, 989228019	FB5V	0	0	0	0	0	0	0	41	0	0	0	0	0	0	0	0	0	0	0	0	0	38	0	0	0	0	0	0	0	0	0	0	0	0	0	114		0
CRE107	447.29	75.38	510.17	7.37	13.15	12.64	1066	0.478583	glutamate	518558825, 550426732	CRE107	0	0	0	0	0	0	0	0	0	0	0	0	0	0	0	0	0	0	0	0	0	0	0	0	0	0	26	0	0	0	0	0	0	0	18	0		0
SMP053	376.32	59.4649	471.505	4.0039	27.1976	60.5086	999	0.471977	glutamate	550750102, 5813032847	SMP053	0	0	0	0	0	0	0	0	0	0	0	0	0	0	0	0	0	0	0	0	0	0	0	0	0	0	0	0	0	0	0	0	0	0	0	0		0
SMP056	366.96	53.0532	465.54	7.3391	32.3025	47.8053	973	0.478459	glutamate	5813012637, 613420343	SMP056	0	0	0	0	0	0	0	0	0	0	0	0	0	0	0	0	0	0	0	0	0	0	0	0	0	0	0	0	0	0	0	0	0	0	0	0		0
CRE022	878.007	115.244	1145.03	7.0465	18.6367	43.0404	2207	0.518815	glutamate	5813062838, 5813083779	CRE022	0	0	0	0	180	0	0	0	0	0	34	0	0	0	0	0	0	0	0	0	0	0	44	0	0	0	26	0	0	0	15	29	37	0	0	0		0
CRE006	397.685	72.6422	439.683	7.1521	17.1075	39.7308	974	0.451419	glutamate	5813082723, 736174181	CRE006	0	0	0	0	17	0	0	0	0	0	0	0	0	0	0	0	0	0	0	0	0	0	0	0	0	0	0	0	0	0	0	0	0	0	0	0		0
SMP086	177.22	71.12	529.21	29.31	21.03	27.11	855	0.618959	glutamate	298616588, 299621755, 5813019517	SMP086	0	0	0	0	0	0	0	0	0	0	0	0	0	0	0	0	0	0	0	66	0	0	0	0	0	0	0	0	0	0	0	0	0	0	0	0		1
LHAD3g1	117.305	47.8965	225.861	13.5558	5.2991	15.0828	425	0.531438	glutamate	487148422, 516832391, 5813014526	LHAD3g1	0	0	0	0	0	0	0	0	0	0	0	0	0	0	0	0	0	11	0	0	0	0	0	0	0	0	0	0	0	0	0	0	0	0	0	0		0
LHAV6g1	170.037	74.0033	342.935	6.7637	5.6021	8.6593	608	0.564037	glutamate	5813057216	LHAV6g1	14	0	0	0	0	0	0	0	0	0	0	0	0	0	46	0	0	0	0	0	0	0	0	0	0	0	0	0	27	0	0	0	0	0	0	0		0
FB8F_a	53.16	24.05	70.08	8.16	6.86	20.68	183	0.382972	glutamate	297178509, 328213227, 328930845, 5812979942	FB8F_a	0	0	0	0	0	0	0	0	0	0	0	0	0	0	0	0	0	0	0	0	0	0	0	42	12	0	0	0	0	0	0	0	0	0	0	0		1
FB4G	405.063	162.617	615.227	12.4556	114.106	187.533	1497	0.410973	glutamate	5813061541, 988567837	FB4G	0	0	0	0	0	0	0	0	0	0	0	0	0	0	0	0	0	0	0	0	0	0	0	0	0	0	14	0	0	0	0	0	0	0	0	0		0
ATL017	128.648	127.597	736.347	97.1891	74.6021	167.617	1332	0.552813	glutamate	455141922, 607373222	ATL017	0	0	0	46	17	0	0	0	0	0	32	0	0	0	0	0	0	0	0	10	0	0	0	0	0	0	0	0	0	0	0	0	0	0	0	0		0
LAL150	136.827	56.3495	341.07	18.2579	53.3402	49.1543	655	0.520718	glutamate	1005611902, 1036637830, 1449947867, 5813015594	LAL150	0	0	0	0	0	0	0	0	0	0	0	0	0	0	0	0	0	0	0	0	0	0	0	0	0	0	0	0	0	0	0	0	0	0	0	97		0
LHCENT4	391.428	133.384	585.543	41.9902	20.7348	14.92	1188	0.492882	glutamate	517506265	LHCENT4	0	41	0	0	0	0	0	0	0	0	123	122	0	0	0	0	11	13	36	0	131	0	0	0	0	0	0	0	55	0	0	0	0	0	0	0		7
FB4A	188.977	64.2771	545.77	7.7466	64.7149	112.514	984	0.554645	glutamate	1015592525, 1101133654, 1132172898, 1162871168, 1225290240, 5813062647, 5813087837, 858933153	FB4A	0	0	0	98	0	0	0	0	0	0	36	0	0	0	0	0	0	0	0	0	0	0	0	0	0	0	0	0	0	0	0	0	0	0	0	0		0
LAL149	110.518	56.3953	177.269	8.8671	27.1555	30.795	411	0.431311	glutamate	1036646944, 1037332628	LAL149	0	0	0	0	0	0	0	0	0	0	0	0	0	0	0	0	0	0	0	0	0	0	0	0	0	0	0	0	0	0	0	0	0	0	0	163		0
SMP450	93.5365	15.9666	187.124	3.5072	2.3454	4.5199	307	0.609526	glutamate	1205220831, 356909006, 357250005, 5813061974	SMP450	0	0	0	0	0	0	0	0	0	0	0	0	0	0	0	0	0	0	0	0	0	0	0	0	0	0	0	0	0	0	70	0	0	0	0	0		0
LAL074	252.407	129.494	635.237	4.9606	6.3951	9.5061	1038	0.611982	glutamate	1572390197, 1789613296	LAL074	0	0	0	0	0	0	0	0	0	0	0	0	0	0	0	0	0	0	0	0	0	0	0	0	0	0	0	17	0	0	0	13	74	0	0	0		0
SMP447	138.674	46.7437	250.444	7.8407	7.8575	9.4403	461	0.543261	glutamate	703740639, 736157288	SMP447	0	0	0	0	0	0	0	0	0	0	0	0	0	0	0	0	0	0	0	0	0	0	0	0	0	0	0	0	0	0	63	0	0	0	0	0		0
FB6A	942.24	789.21	668.41	207.56	2239.68	1047.9	5895	0.379929	octopamine	5813055834, 5813061495, 946308203	FB6A	0	0	0	0	0	0	0	0	0	0	0	0	0	0	0	0	0	0	0	0	0	0	0	0	15	0	0	0	0	0	0	0	0	0	0	0		0
OA-VUMa7	50.5909	72.0427	36.4061	314.613	4190.46	489.886	5154	0.81305	octopamine	576825965	OA-VUMa7	0	0	0	0	0	0	0	0	0	0	0	0	0	0	0	0	0	0	0	0	0	0	0	0	0	0	0	0	0	0	0	0	0	29	0	11		0
type	gaba	acetylcholine	glutamate	serotonin	octopamine	dopamine	N_synapses		NTprediction
[truncated: 466 more columns]
